# Supplementary material for: A combination of two ELISA tests for nasopharyngeal carcinoma screening in endemic areas based on a case-control study
Source: PeerJ. 2020 Nov 12;8:e10254. doi: 10.7717/peerj.10254 (PMC7666820; doi:10.7717/peerj.10254)
Supplement: Supplemental Information 1 [file peerj-08-10254-s001.xls]

## Sheet: raw data
ID	EBNA1-IgA rOD	VCA-IgA rOD	PROB	smoking history	family history of NPC	NPC or not	stage	combination	age group	sex	Group
V578	0.21	13.26	1	0	0	1	advanced-stage	2.7846	60	M	training group
V585	2.615	12.25	1	0	0	1	advanced-stage	32.0338	65	F	training group
V567	2.45	10.37	1	1	1	1	advanced-stage	25.4065	60	M	training group
V636	2.81	10.15	1	0	0	1	advanced-stage	28.5215	40	M	training group
V623	4.386	10.11	1	1	0	1	advanced-stage	44.3425	35	M	training group
V624	0.338	10.11	1	0	0	1	advanced-stage	3.41718	60	M	validation group
V617	2.121	9.83	1	0	0	1	advanced-stage	20.8494	35	F	training group
V756	4.362	9.2	1	1	0	1	advanced-stage	40.1304	60	M	validation group
V876	5.2	8.71	1	0	0	1	advanced-stage	45.292	45	M	training group
V546	6.193	8.68	1	0	0	1	advanced-stage	53.7552	60	F	training group
V681	2.487	8.58	1	0	0	1	advanced-stage	21.3385	40	M	training group
V805	2.038	8.39	1	0	0	1	advanced-stage	17.0988	65	F	training group
V865	4.248	8.36	1	0	0	1	advanced-stage	35.5133	40	M	validation group
V669	2.28	8.33	1	1	0	1	advanced-stage	18.9924	40	M	training group
V554	0.232	8.33	1	1	1	1	advanced-stage	1.93256	50	M	validation group
V630	0.671	8.22	1	0	0	1	advanced-stage	5.51562	30	M	validation group
V769	3.725	8.19	1	0	0	1	advanced-stage	30.5077	55	F	training group
V868	4.247	8.18	1	0	0	1	advanced-stage	34.7405	55	M	training group
V483	4.963	8.17	1	1	0	1	advanced-stage	40.5477	40	M	training group
V34	2.154	8.16	1	0	0	1	advanced-stage	17.5766	45	F	training group
V547	0.938	8.16	1	0	0	1	advanced-stage	7.65408	45	F	training group
V528	5.174	8.09	1	0	0	1	advanced-stage	41.8577	65	M	training group
V565	4	8	1	0	0	1	advanced-stage	32	45	F	training group
V576	4.142	7.99	1	0	0	1	early-stage	33.0946	50	F	training group
V559	0.337	7.91	1	0	0	1	advanced-stage	2.66567	65	M	training group
V766	3.111	7.9	1	1	1	1	advanced-stage	24.5769	45	M	validation group
V62	2.238	7.84	1	0	0	1	advanced-stage	17.5459	55	M	validation group
V27	1.446	7.82	1	0	1	1	advanced-stage	11.3077	50	F	training group
V185	2.269	7.8	1	1	0	1	advanced-stage	17.6982	40	M	training group
V875	3.285	7.76	1	1	0	1	advanced-stage	25.4916	55	M	validation group
V826	5.08	7.67	1	1	0	1	advanced-stage	38.9636	65	M	training group
V542	5.453	7.59	1	0	0	1	early-stage	41.3883	60	M	training group
V594	0.377	7.55	1	0	0	1	advanced-stage	2.84635	35	F	validation group
V18	3.903	7.53	1	1	0	1	advanced-stage	29.3896	55	M	training group
V689	2.054	7.51	1	0	0	1	advanced-stage	15.4255	30	F	training group
V475	3.104	7.4	1	1	0	1	advanced-stage	22.9696	60	M	training group
V489	3.886	7.39	1	0	0	1	advanced-stage	28.7175	45	M	training group
V531	5.843	7.25	1	1	0	1	advanced-stage	42.3618	30	M	training group
V48	1.615	7.25	1	0	0	1	advanced-stage	11.7088	45	F	validation group
V632	0.506	7.25	1	0	0	1	advanced-stage	3.6685	40	M	training group
V587	2.121	7.09	1	1	0	1	advanced-stage	15.0379	55	M	training group
V730	3.76	7.08	1	1	0	1	advanced-stage	26.6208	60	M	validation group
V831	2.016	7.07	1	1	0	1	advanced-stage	14.2531	30	M	validation group
V342	1.888	7.07	1	0	0	1	advanced-stage	13.3482	35	M	validation group
V887	4.625	7.06	1	0	1	1	advanced-stage	32.6525	40	F	training group
V759	4.001	7.05	1	0	0	1	advanced-stage	28.2071	55	F	training group
V561	2.355	7.04	1	1	0	1	early-stage	16.5792	40	M	training group
V548	2.345	7.02	1	1	0	1	advanced-stage	16.4619	40	M	training group
V539	4.71	7.01	1	0	0	1	advanced-stage	33.0171	45	M	validation group
V465	2.172	7.01	1	0	0	1	advanced-stage	15.2257	45	M	validation group
V621	2.446	6.97	1	1	0	1	advanced-stage	17.0486	55	M	validation group
V645	3.113	6.96	1	0	0	1	early-stage	21.6665	45	F	training group
V664	2.294	6.93	1	0	0	1	advanced-stage	15.8974	35	M	training group
V545	1.855	6.93	1	1	0	1	advanced-stage	12.8552	55	M	validation group
V350	3.478	6.92	1	0	0	1	advanced-stage	24.0678	65	M	training group
V846	2.057	6.9	1	1	0	1	advanced-stage	14.1933	65	M	validation group
V882	4.084	6.84	1	1	0	1	advanced-stage	27.9346	50	M	training group
V81	2.779	6.8	1	0	0	1	advanced-stage	18.8972	50	M	training group
V627	1.068	6.79	1	0	0	1	advanced-stage	7.25172	60	M	training group
V49	2.229	6.78	1	1	1	1	advanced-stage	15.1126	45	M	training group
V138	1.534	6.73	1	0	0	1	advanced-stage	10.3238	35	M	training group
V303	1.248	6.7	1	0	0	1	advanced-stage	8.3616	50	M	training group
V566	3.318	6.69	1	0	0	1	early-stage	22.1974	50	M	training group
V203	0.576	6.67	1	0	0	1	advanced-stage	3.84192	55	F	training group
V89	2.298	6.57	1	1	0	1	advanced-stage	15.0979	30	M	training group
V10	3.111	6.51	1	1	0	1	advanced-stage	20.2526	50	F	training group
V339	1.545	6.47	1	0	0	1	advanced-stage	9.99615	45	M	validation group
V384	1.221	6.47	1	1	0	1	advanced-stage	7.89987	40	M	validation group
V217	1.087	6.47	1	0	0	1	advanced-stage	7.03289	50	M	training group
V423	0.657	6.4	1	0	0	1	advanced-stage	4.2048	40	M	validation group
V455	0.443	6.34	1	1	0	1	advanced-stage	2.80862	55	M	training group
V75	3.454	6.26	1	1	0	1	advanced-stage	21.622	40	M	validation group
V574	1.364	6.24	1	0	0	1	advanced-stage	8.51136	30	F	validation group
V899	2.782	6.17	1	1	0	1	advanced-stage	17.1649	45	M	validation group
V502	0.807	6.17	1	1	0	1	early-stage	4.97919	60	M	training group
V316	2.846	6.16	1	1	1	1	advanced-stage	17.5314	45	M	training group
V862	2.853	6.12	1	1	0	1	advanced-stage	17.4604	40	F	training group
V175	2.844	6.12	1	0	0	1	advanced-stage	17.4053	60	F	validation group
V619	3.755	6.09	1	0	0	1	early-stage	22.868	35	M	training group
V625	1.901	6.09	1	1	0	1	early-stage	11.5771	50	M	validation group
V400	2.305	6.03	1	0	0	1	advanced-stage	13.8992	35	F	training group
V191	1.108	6.03	1	0	0	1	advanced-stage	6.68124	40	M	training group
V90	0.407	5.95	1	0	0	1	advanced-stage	2.42165	50	F	training group
V433	2.803	5.94	1	0	0	1	advanced-stage	16.6498	55	M	validation group
V708	1.667	5.93	1	0	1	1	early-stage	9.88531	35	F	validation group
V742	3.55	5.88	1	0	0	1	advanced-stage	20.874	50	M	validation group
V856	0.572	5.88	1	0	0	1	advanced-stage	3.36336	45	M	training group
V734	4.001	5.85	1	0	0	1	advanced-stage	23.4059	50	M	validation group
V16	2.524	5.83	1	0	0	1	advanced-stage	14.7149	60	M	validation group
V213	3.637	5.82	1	0	0	1	advanced-stage	21.1673	45	M	training group
V704	2.799	5.82	1	0	0	1	advanced-stage	16.2902	55	F	training group
V534	1.257	5.78	1	0	0	1	early-stage	7.26546	45	M	validation group
V762	2.853	5.75	1	0	0	1	advanced-stage	16.4047	55	F	training group
V827	5.19	5.74	1	1	0	1	advanced-stage	29.7906	30	M	training group
V431	2.737	5.73	1	0	0	1	advanced-stage	15.683	60	M	training group
V163	2.167	5.67	1	1	0	1	advanced-stage	12.2869	35	M	training group
V513	2.108	5.66	1	0	0	1	advanced-stage	11.9313	55	M	validation group
V560	1.205	5.66	1	0	0	1	advanced-stage	6.8203	45	M	training group
V498	5.573	5.62	1	1	1	1	advanced-stage	31.3203	55	M	training group
V701	0.826	5.61	1	0	0	1	advanced-stage	4.63386	40	M	validation group
V8	0.293	5.57	1	0	0	1	advanced-stage	1.63201	60	M	training group
V622	0.082	5.57	1	1	0	1	advanced-stage	0.45674	50	M	training group
V403	3.214	5.55	1	1	0	1	advanced-stage	17.8377	55	M	validation group
V113	2.775	5.55	1	0	0	1	advanced-stage	15.4012	45	M	training group
V14	2.348	5.51	1	0	0	1	advanced-stage	12.9375	40	F	training group
V504	1.253	5.43	1	0	0	1	advanced-stage	6.80379	65	M	training group
V525	5.389	5.42	1	0	0	1	advanced-stage	29.2084	60	F	validation group
V874	3.407	5.42	1	0	0	1	early-stage	18.4659	55	M	training group
V530	1.634	5.42	1	0	0	1	early-stage	8.85628	65	M	validation group
V145	1.902	5.41	1	0	0	1	advanced-stage	10.2898	35	M	training group
V551	4.418	5.38	1	0	0	1	advanced-stage	23.7688	45	M	training group
V160	3.383	5.36	1	0	0	1	advanced-stage	18.1329	60	M	validation group
V626	0.378	5.35	1	1	0	1	advanced-stage	2.0223	45	M	validation group
V204	1.945	5.3	1	0	0	1	advanced-stage	10.3085	65	F	training group
V132	2.591	5.29	1	1	0	1	advanced-stage	13.7064	65	M	training group
V454	1.54	5.28	1	0	0	1	advanced-stage	8.1312	40	M	training group
V508	0.646	5.25	1	1	0	1	advanced-stage	3.3915	60	M	training group
V214	0.359	5.24	1	0	0	1	advanced-stage	1.88116	55	F	training group
V590	0.767	5.22	1	0	0	1	advanced-stage	4.00374	35	M	validation group
V810	3.688	5.21	1	1	0	1	advanced-stage	19.2145	50	M	training group
V320	3.134	5.15	1	1	0	1	advanced-stage	16.1401	50	M	validation group
V365	0.934	5.15	1	0	1	1	advanced-stage	4.8101	50	F	training group
V616	0.836	5.14	1	0	0	1	advanced-stage	4.29704	60	M	training group
V103	0.772	5.13	1	0	1	1	early-stage	3.96036	30	M	validation group
V411	0.288	5.13	1	0	0	1	early-stage	1.47744	65	F	validation group
V485	2.23	5.12	1	0	0	1	advanced-stage	11.4176	30	F	validation group
V774	1.467	5.12	1	0	0	1	advanced-stage	7.51104	50	M	validation group
V800	2.218	5.1	1	0	0	1	advanced-stage	11.3118	50	F	validation group
V153	0.509	5.06	1	1	0	1	advanced-stage	2.57554	60	M	validation group
V767	3.323	5.03	1	1	0	1	advanced-stage	16.7147	60	M	validation group
V904	3.074	5.03	1	0	0	1	advanced-stage	15.4622	60	M	training group
V211	2.028	5.02	1	0	0	1	advanced-stage	10.1806	45	M	validation group
V822	4.932	5.01	1	1	0	1	advanced-stage	24.7093	60	M	validation group
V654	3.111	4.99	1	1	1	1	advanced-stage	15.5239	50	M	validation group
V613	2.255	4.99	1	1	0	1	advanced-stage	11.2524	50	M	training group
V533	4.414	4.96	1	0	0	1	advanced-stage	21.8934	40	F	validation group
V315	3.406	4.95	1	0	0	1	advanced-stage	16.8597	55	F	training group
V39	3.506	4.85	1	1	0	1	advanced-stage	17.0041	45	M	validation group
V900	3.124	4.85	1	0	0	1	advanced-stage	15.1514	55	F	training group
V407	3.318	4.77	1	0	0	1	advanced-stage	15.8269	45	F	training group
V606	0.655	4.76	1	1	0	1	advanced-stage	3.1178	50	M	training group
V390	0.875	4.75	1	0	0	1	advanced-stage	4.15625	45	M	training group
V332	0.367	4.74	1	1	0	1	advanced-stage	1.73958	60	M	validation group
V351	2.742	4.71	1	0	0	1	advanced-stage	12.9148	30	M	training group
V706	1.876	4.71	1	1	0	1	advanced-stage	8.83596	55	M	training group
V780	0.871	4.7	1	0	0	1	advanced-stage	4.0937	45	M	training group
V569	2.264	4.69	1	0	0	1	advanced-stage	10.6182	55	F	training group
V581	1.429	4.67	1	0	1	1	early-stage	6.67343	45	F	validation group
V176	1.039	4.62	1	0	0	1	advanced-stage	4.80018	50	M	validation group
V707	2.083	4.61	1	0	0	1	advanced-stage	9.60263	50	F	validation group
V177	1.474	4.61	1	0	0	1	advanced-stage	6.79514	45	F	training group
V749	4.131	4.58	1	0	1	1	early-stage	18.92	30	M	training group
V13	1.877	4.55	1	0	0	1	advanced-stage	8.54035	50	F	validation group
V723	3.092	4.54	1	0	0	1	advanced-stage	14.0377	45	F	training group
V571	3.449	4.52	1	0	0	1	advanced-stage	15.5895	50	F	validation group
V207	0.124	4.51	1	1	0	1	advanced-stage	0.55924	45	M	training group
V511	1.795	4.48	1	0	1	1	advanced-stage	8.0416	45	M	validation group
V312	1.473	4.48	1	1	0	1	early-stage	6.59904	50	M	validation group
V404	3.453	4.47	1	0	0	1	advanced-stage	15.4349	55	M	validation group
V700	2.029	4.47	1	0	0	1	advanced-stage	9.06963	40	M	training group
V725	2.116	4.43	1	0	0	1	advanced-stage	9.37388	45	M	training group
V377	3.228	4.41	1	0	0	1	advanced-stage	14.2355	60	M	training group
V108	1.48	4.4	1	0	0	1	advanced-stage	6.512	45	M	training group
V675	2.708	4.38	1	0	0	1	advanced-stage	11.861	50	M	validation group
V482	6.375	4.37	1	1	0	1	advanced-stage	27.8588	60	M	training group
V85	2.865	4.37	1	1	0	1	advanced-stage	12.5201	60	M	training group
V864	3.55	4.36	1	1	0	1	advanced-stage	15.478	45	M	training group
V184	0.531	4.33	1	1	0	1	advanced-stage	2.29923	45	M	validation group
V584	3.413	4.32	1	1	0	1	advanced-stage	14.7442	50	M	training group
V356	3.088	4.31	1	1	0	1	advanced-stage	13.3093	40	M	training group
V7	0.621	4.27	1	0	0	1	advanced-stage	2.65167	55	F	validation group
V802	3.635	4.26	1	1	0	1	advanced-stage	15.4851	55	M	validation group
V313	0.355	4.26	1	0	0	1	advanced-stage	1.5123	60	M	validation group
V392	1.542	4.25	1	0	0	1	early-stage	6.5535	60	M	validation group
V818	2.078	4.24	1	1	0	1	advanced-stage	8.81072	50	M	training group
V459	3.014	4.18	1	0	0	1	advanced-stage	12.5985	45	M	validation group
V886	1.416	4.18	1	0	0	1	early-stage	5.91888	65	F	training group
V603	2.782	4.16	1	1	0	1	advanced-stage	11.5731	35	M	training group
V344	0.511	4.13	1	1	0	1	advanced-stage	2.11043	65	M	validation group
V753	2.858	4.11	1	0	0	1	advanced-stage	11.7464	40	M	training group
V793	0.576	4.09	1	1	0	1	advanced-stage	2.35584	60	M	training group
V719	0.702	4.04	1	1	0	1	advanced-stage	2.83608	30	F	training group
V118	3.062	4.03	1	0	0	1	advanced-stage	12.3399	40	M	training group
V505	4.799	4.02	1	1	0	1	advanced-stage	19.292	60	M	training group
V438	1.295	4.02	1	0	0	1	advanced-stage	5.2059	30	F	training group
V305	0.362	4.02	1	0	0	1	advanced-stage	1.45524	50	M	training group
V757	1.205	4.01	1	0	0	1	advanced-stage	4.83205	60	M	training group
V128	0.358	3.98	1	1	0	1	advanced-stage	1.42484	65	M	training group
V538	1.019	3.94	1	0	0	1	advanced-stage	4.01486	65	F	validation group
V506	4.921	3.91	1	0	0	1	advanced-stage	19.2411	50	F	training group
V752	4.456	3.9	1	1	0	1	advanced-stage	17.3784	65	M	validation group
V639	3.045	3.87	1	0	0	1	advanced-stage	11.7842	60	F	validation group
V493	1.607	3.87	1	1	0	1	early-stage	6.21909	60	M	training group
V172	3.054	3.86	1	1	0	1	advanced-stage	11.7884	65	M	validation group
V718	2.979	3.86	1	0	0	1	advanced-stage	11.4989	45	F	validation group
V63	2.702	3.86	1	1	1	1	advanced-stage	10.4297	50	M	training group
V892	1.83	3.86	1	1	0	1	advanced-stage	7.0638	55	F	training group
V362	2.374	3.79	1	0	0	1	advanced-stage	8.99746	40	M	training group
V649	0.239	3.79	1	0	0	1	advanced-stage	0.90581	45	M	validation group
V761	3.714	3.76	1	1	0	1	advanced-stage	13.9646	45	M	training group
V134	0.338	3.76	1	0	0	1	advanced-stage	1.27088	40	M	training group
V109	1.325	3.75	1	0	0	1	advanced-stage	4.96875	60	M	training group
V703	3.142	3.74	1	1	0	1	advanced-stage	11.7511	50	M	validation group
V523	6.992	3.71	1	0	0	1	early-stage	25.9403	30	M	validation group
V549	1.418	3.69	1	0	0	1	advanced-stage	5.23242	50	F	training group
V326	1.622	3.68	1	0	0	1	advanced-stage	5.96896	45	M	training group
V199	2.086	3.66	1	1	0	1	advanced-stage	7.63476	65	M	validation group
V678	2.963	3.65	1	0	0	1	advanced-stage	10.8149	55	M	training group
V38	2.541	3.64	1	0	0	1	advanced-stage	9.24924	45	M	validation group
V515	7.164	3.61	1	1	0	1	advanced-stage	25.862	60	M	training group
V104	2.571	3.61	1	0	0	1	advanced-stage	9.28131	50	M	validation group
V601	2.45	3.6	1	0	0	1	advanced-stage	8.82	55	M	training group
V896	0.911	3.56	1	0	0	1	advanced-stage	3.24316	45	F	validation group
V155	1.071	3.54	1	0	0	1	advanced-stage	3.79134	30	F	validation group
V190	1.835	3.52	1	0	0	1	early-stage	6.4592	45	F	training group
V361	1.417	3.49	1	0	0	1	advanced-stage	4.94533	45	M	training group
V114	2.419	3.45	1	0	0	1	advanced-stage	8.34555	40	F	training group
V470	5.71	3.43	1	1	0	1	advanced-stage	19.5853	45	M	training group
V812	1.502	3.43	1	1	0	1	advanced-stage	5.15186	65	M	validation group
V635	2.183	3.39	1	0	0	1	advanced-stage	7.40037	35	F	validation group
V74	1.721	3.39	1	1	0	1	early-stage	5.83419	60	M	training group
V589	1.615	3.37	1	0	0	1	advanced-stage	5.44255	55	F	training group
V142	1.653	3.36	1	0	0	1	advanced-stage	5.55408	40	M	training group
V28	2.184	3.35	1	0	0	1	advanced-stage	7.3164	55	F	validation group
V770	1.239	3.32	1	1	0	1	early-stage	4.11348	45	M	validation group
V665	2.287	3.31	1	0	0	1	advanced-stage	7.56997	40	M	training group
V162	0.921	3.31	1	0	0	1	early-stage	3.04851	60	F	training group
V309	1.508	3.3	1	0	0	1	advanced-stage	4.9764	40	F	validation group
V733	0.427	3.27	1	0	0	1	advanced-stage	1.39629	55	F	training group
V301	3.128	3.26	1	1	0	1	advanced-stage	10.1973	50	M	validation group
V893	1.142	3.26	1	0	0	1	early-stage	3.72292	35	M	validation group
V727	1.156	3.25	1	0	0	1	advanced-stage	3.757	45	F	training group
V306	1.885	3.24	1	1	0	1	advanced-stage	6.1074	45	M	training group
V337	2.434	3.2	1	0	0	1	early-stage	7.7888	45	M	training group
V484	1.557	3.18	1	0	0	1	advanced-stage	4.95126	65	F	validation group
V500	1.234	3.18	1	0	0	1	advanced-stage	3.92412	40	F	validation group
V806	2.284	3.16	1	0	0	1	advanced-stage	7.21744	50	F	validation group
V698	0.883	3.16	1	0	0	1	advanced-stage	2.79028	60	M	training group
V151	2.587	3.15	1	1	1	1	advanced-stage	8.14905	45	M	training group
V745	1.467	3.14	1	1	0	1	advanced-stage	4.60638	65	M	validation group
V684	1.413	3.12	1	0	0	1	advanced-stage	4.40856	50	F	training group
V174	2.479	3.1	1	0	0	1	advanced-stage	7.6849	40	M	training group
V796	4.004	3.08	1	0	0	1	advanced-stage	12.3323	50	F	validation group
V821	3.792	3.07	1	0	0	1	advanced-stage	11.6414	45	M	validation group
V84	3.226	3.07	1	1	0	1	advanced-stage	9.90382	50	M	validation group
V658	2.149	3.07	1	1	0	1	advanced-stage	6.59743	40	M	training group
V135	1.785	3.07	1	0	0	1	advanced-stage	5.47995	40	M	validation group
V72	1.752	3.07	1	1	0	1	advanced-stage	5.37864	40	M	validation group
V777	1.74	3.07	1	1	1	1	advanced-stage	5.3418	45	M	training group
V857	1.613	3.07	1	1	0	1	advanced-stage	4.95191	50	M	validation group
V656	2.33	3.06	1	1	0	1	advanced-stage	7.1298	60	M	training group
V181	2.143	3.04	1	0	0	1	early-stage	6.51472	35	M	training group
V9	0.782	3.04	1	0	0	1	advanced-stage	2.37728	60	F	training group
V401	2.11	3.03	1	1	0	1	advanced-stage	6.3933	55	M	validation group
V597	0.867	3.03	1	1	0	1	advanced-stage	2.62701	50	M	training group
V440	1.169	3.02	1	0	0	1	early-stage	3.53038	60	F	training group
V775	3.591	3.01	1	0	0	1	early-stage	10.8089	45	F	training group
V117	2.147	2.99	1	1	0	1	advanced-stage	6.41953	55	M	validation group
V536	4.836	2.98	1	0	0	1	early-stage	14.4113	50	F	training group
V735	0.656	2.98	1	0	0	1	advanced-stage	1.95488	65	M	training group
V612	2.455	2.95	1	1	0	1	early-stage	7.24225	65	M	training group
V369	3.085	2.94	1	1	0	1	advanced-stage	9.0699	65	M	training group
V375	3.386	2.93	1	0	0	1	advanced-stage	9.92098	50	F	training group
V133	2.094	2.93	1	1	0	1	early-stage	6.13542	55	M	validation group
V798	2.825	2.92	1	1	0	1	advanced-stage	8.249	30	M	training group
V540	0.839	2.91	1	0	1	1	advanced-stage	2.44149	55	M	training group
V357	1.58	2.9	1	1	1	1	advanced-stage	4.582	55	M	training group
V487	0.87	2.88	1	0	0	1	advanced-stage	2.5056	60	F	validation group
V347	2.296	2.87	1	0	1	1	advanced-stage	6.58952	55	F	training group
V507	1.199	2.87	1	0	0	1	advanced-stage	3.44113	50	M	training group
V860	1.573	2.85	1	0	0	1	advanced-stage	4.48305	60	M	validation group
V327	0.713	2.81	1	0	0	1	advanced-stage	2.00353	40	M	training group
V349	3.529	2.8	1	1	0	1	advanced-stage	9.8812	40	M	validation group
V527	5.778	2.79	1	0	0	1	early-stage	16.1206	40	M	validation group
V760	3.665	2.76	1	0	1	1	advanced-stage	10.1154	55	F	validation group
V192	1.021	2.76	1	0	0	1	advanced-stage	2.81796	55	M	validation group
V695	2.93	2.74	1	0	0	1	advanced-stage	8.0282	45	M	training group
V816	0.706	2.73	1	0	0	1	advanced-stage	1.92738	45	M	training group
V36	3.558	2.71	1	1	0	1	advanced-stage	9.64218	50	M	validation group
V631	1.19	2.71	1	0	0	1	advanced-stage	3.2249	60	M	training group
V364	3.261	2.7	1	0	0	1	advanced-stage	8.8047	50	F	validation group
V461	2.93	2.69	1	0	0	1	advanced-stage	7.8817	55	M	training group
V467	3.607	2.67	1	0	1	1	advanced-stage	9.63069	50	M	validation group
V815	2.787	2.65	1	0	0	1	advanced-stage	7.38555	45	F	training group
V125	0.852	2.65	1	1	0	1	advanced-stage	2.2578	40	M	training group
V26	3.506	2.63	1	0	0	1	advanced-stage	9.22078	55	F	validation group
V105	2.254	2.63	1	1	0	1	advanced-stage	5.92802	50	M	validation group
V602	4.1	2.59	1	1	0	1	advanced-stage	10.619	50	M	training group
V161	1.311	2.59	1	0	0	1	advanced-stage	3.39549	45	F	training group
V720	1.243	2.57	1	1	0	1	advanced-stage	3.19451	55	M	validation group
V713	1.758	2.56	1	0	1	1	advanced-stage	4.50048	45	F	validation group
V394	1.271	2.55	1	0	0	1	advanced-stage	3.24105	60	M	training group
V20	1.91	2.54	1	1	0	1	advanced-stage	4.8514	60	M	validation group
V750	1.103	2.54	1	0	0	1	advanced-stage	2.80162	50	F	validation group
V366	1.937	2.53	1	1	0	1	advanced-stage	4.90061	40	M	training group
V521	2.677	2.49	1	0	0	1	advanced-stage	6.66573	45	F	validation group
V121	1.74	2.49	1	1	0	1	advanced-stage	4.3326	35	M	training group
V53	1.637	2.49	1	1	0	1	advanced-stage	4.07613	55	M	validation group
V100	1.624	2.46	1	0	0	1	advanced-stage	3.99504	55	M	training group
V895	2.514	2.44	1	0	0	1	advanced-stage	6.13416	55	M	training group
V421	1.201	2.43	1	0	0	1	advanced-stage	2.91843	60	F	validation group
V180	1.204	2.39	1	0	0	1	advanced-stage	2.87756	45	M	training group
V853	5.002	2.37	1	0	0	1	advanced-stage	11.8547	50	M	validation group
V902	1.313	2.37	1	1	0	1	early-stage	3.11181	55	M	training group
V838	4.484	2.34	1	1	0	1	advanced-stage	10.4926	55	F	training group
V317	3.325	2.34	1	0	0	1	advanced-stage	7.7805	55	F	training group
V553	3.259	2.34	1	0	0	1	early-stage	7.62606	50	M	training group
V119	1.733	2.32	1	1	0	1	advanced-stage	4.02056	50	M	training group
V324	1.003	2.31	1	0	0	1	advanced-stage	2.31693	55	F	validation group
V335	2.073	2.24	1	1	1	1	advanced-stage	4.64352	50	M	validation group
V330	1.754	2.23	1	1	0	1	advanced-stage	3.91142	30	M	training group
V660	1.898	2.22	1	0	0	1	advanced-stage	4.21356	50	M	validation group
V716	1.55	2.22	1	0	0	1	advanced-stage	3.441	60	M	training group
V78	1.313	2.2	1	1	1	1	advanced-stage	2.8886	65	M	validation group
V744	2.705	2.18	1	0	0	1	advanced-stage	5.8969	35	M	validation group
V711	2.419	2.17	1	1	1	1	advanced-stage	5.24923	45	M	validation group
V136	2.722	2.16	1	0	0	1	advanced-stage	5.87952	45	M	validation group
V447	1.879	2.16	1	0	0	1	advanced-stage	4.05864	60	M	validation group
V850	0.985	2.15	1	0	0	1	advanced-stage	2.11775	65	M	validation group
V564	1.678	2.14	1	0	0	1	advanced-stage	3.59092	55	M	training group
V839	2.561	2.11	1	0	0	1	advanced-stage	5.40371	35	F	training group
V847	2.219	2.09	1	0	0	1	advanced-stage	4.63771	50	M	training group
V492	3.745	2.07	1	1	0	1	advanced-stage	7.75215	60	M	training group
V877	3.14	2.06	1	1	0	1	early-stage	6.4684	40	M	validation group
V570	4.255	2.02	1	1	0	1	advanced-stage	8.5951	30	M	training group
V334	2.31	2.01	1	1	0	1	advanced-stage	4.6431	35	M	validation group
V661	1.855	2	1	0	0	1	advanced-stage	3.71	35	M	training group
V456	5.257	1.99	1	0	0	1	advanced-stage	10.4614	60	M	training group
V388	1.925	1.99	1	1	1	1	advanced-stage	3.83075	35	M	training group
V835	1.356	1.98	1	0	0	1	early-stage	2.68488	45	M	training group
V468	3.493	1.97	1	0	0	1	advanced-stage	6.88121	45	M	validation group
V763	2.24	1.97	1	0	0	1	advanced-stage	4.4128	45	M	training group
V416	1.421	1.97	1	0	0	1	early-stage	2.79937	30	F	training group
V607	2.251	1.95	1	0	0	1	advanced-stage	4.38945	40	F	training group
V709	1.268	1.94	1	1	0	1	advanced-stage	2.45992	45	M	training group
V425	2.644	1.88	1	0	0	1	advanced-stage	4.97072	35	M	validation group
V314	1.701	1.88	1	1	0	1	advanced-stage	3.19788	30	M	training group
V699	1.752	1.84	1	0	0	1	early-stage	3.22368	40	M	validation group
V872	4.474	1.83	1	0	0	1	advanced-stage	8.18742	40	M	validation group
V56	2.847	1.83	1	1	0	1	advanced-stage	5.21001	60	M	validation group
V446	1.731	1.83	1	1	0	1	advanced-stage	3.16773	40	M	validation group
V579	3.29	1.81	1	1	0	1	advanced-stage	5.9549	45	M	training group
V765	1.973	1.81	1	0	0	1	advanced-stage	3.57113	55	M	training group
V466	1.346	1.81	1	0	0	1	advanced-stage	2.43626	50	F	training group
V710	2.818	1.78	1	1	0	1	advanced-stage	5.01604	45	M	training group
V379	3.58	1.77	1	0	0	1	advanced-stage	6.3366	60	F	training group
V820	4.788	1.73	1	0	0	1	advanced-stage	8.28324	45	M	validation group
V591	1.276	1.73	1	0	0	1	advanced-stage	2.20748	50	F	training group
V611	1.928	1.7	1	1	0	1	advanced-stage	3.2776	55	M	training group
V776	3.848	1.68	1	0	0	1	advanced-stage	6.46464	50	F	validation group
V550	4.336	1.67	1	0	0	1	advanced-stage	7.24112	60	M	training group
V510	6.149	1.64	1	1	0	1	advanced-stage	10.0844	45	M	validation group
V1	1.558	1.63	1	0	0	1	advanced-stage	2.53954	40	F	validation group
V355	2.16	1.61	1	1	0	1	early-stage	3.4776	50	M	validation group
V702	2.799	1.6	1	0	0	1	advanced-stage	4.4784	45	F	training group
V371	2.088	1.57	1	0	1	1	advanced-stage	3.27816	35	M	training group
V778	3.666	1.55	1	0	0	1	advanced-stage	5.6823	45	M	training group
V652	3.114	1.55	1	0	0	1	advanced-stage	4.8267	30	F	training group
V788	4.251	1.54	1	0	0	1	advanced-stage	6.54654	50	F	training group
V101	3.747	1.52	1	1	0	1	advanced-stage	5.69544	45	M	validation group
V420	2.253	1.5	1	1	0	1	advanced-stage	3.3795	55	M	validation group
V50	1.26	1.49	1	1	0	1	advanced-stage	1.8774	55	M	training group
V714	1.504	1.48	1	0	0	1	advanced-stage	2.22592	60	M	validation group
V879	2.7	1.46	1	0	0	1	advanced-stage	3.942	40	M	validation group
V86	2.829	1.44	1	0	0	1	advanced-stage	4.07376	55	M	validation group
V25	2.028	1.44	1	0	0	1	advanced-stage	2.92032	40	F	training group
V543	4.76	1.43	1	0	0	1	advanced-stage	6.8068	35	M	training group
V787	2.349	1.42	1	0	0	1	advanced-stage	3.33558	45	M	training group
V556	3.931	1.39	1	0	0	1	advanced-stage	5.46409	40	M	training group
V646	2.235	1.39	1	0	1	1	advanced-stage	3.10665	50	M	training group
V655	3.069	1.38	1	0	0	1	advanced-stage	4.23522	60	M	training group
V173	2.347	1.36	1	1	0	1	advanced-stage	3.19192	60	M	validation group
V903	4.082	1.35	1	1	0	1	advanced-stage	5.5107	55	M	training group
V628	2.354	1.35	1	1	0	1	advanced-stage	3.1779	35	M	training group
V592	1.629	1.34	1	0	0	1	advanced-stage	2.18286	60	M	validation group
V572	1.686	1.31	1	0	0	1	advanced-stage	2.20866	40	M	training group
V202	2.771	1.29	1	0	0	1	advanced-stage	3.57459	30	M	validation group
V518	2.551	1.27	1	0	0	1	advanced-stage	3.23977	55	M	training group
V653	2.816	1.26	1	0	0	1	advanced-stage	3.54816	60	M	validation group
V322	1.589	1.26	1	1	1	1	advanced-stage	2.00214	50	F	validation group
V345	2.412	1.24	1	1	0	1	advanced-stage	2.99088	50	M	validation group
V66	2.315	1.24	1	1	0	1	advanced-stage	2.8706	50	M	training group
V848	5.011	1.22	1	1	0	1	advanced-stage	6.11342	40	M	validation group
V764	3.398	1.22	1	0	0	1	advanced-stage	4.14556	40	F	training group
V370	3.59	1.16	1	0	0	1	early-stage	4.1644	50	F	validation group
V881	1.589	1.13	1	1	0	1	advanced-stage	1.79557	35	M	training group
V662	1.495	1.13	1	1	0	1	advanced-stage	1.68935	45	M	validation group
V61	3.464	1.08	1	0	0	1	early-stage	3.74112	50	M	training group
V671	2.62	1.07	1	0	0	1	early-stage	2.8034	50	F	validation group
V329	2.585	1.03	1	0	0	1	advanced-stage	2.66255	30	M	training group
V830	1.705	1.03	1	1	0	1	advanced-stage	1.75615	50	M	training group
V24	1.464	1.02	1	0	0	1	early-stage	1.49328	30	F	validation group
V208	2.002	1.01	1	1	0	1	early-stage	2.02202	55	M	training group
V464	1.658	0.98	1	0	0	1	advanced-stage	1.62484	45	F	validation group
V476	3.503	0.97	1	1	0	1	advanced-stage	3.39791	45	M	training group
V432	2.635	0.97	1	0	0	1	early-stage	2.55595	30	M	validation group
V878	1.736	0.96	1	0	0	1	early-stage	1.66656	55	M	training group
V677	2.969	0.92	1	1	0	1	advanced-stage	2.73148	55	M	validation group
V791	2.188	0.91	1	0	0	1	advanced-stage	1.99108	45	M	validation group
V670	2.32	0.9	1	1	0	1	early-stage	2.088	65	M	validation group
V398	1.898	0.89	1	0	0	1	advanced-stage	1.68922	35	F	validation group
V91	2.964	0.88	1	0	0	1	advanced-stage	2.60832	60	M	validation group
V167	1.849	0.88	1	1	0	1	advanced-stage	1.62712	65	M	validation group
V363	2.976	0.83	1	0	0	1	advanced-stage	2.47008	50	F	validation group
V414	1.772	0.74	1	0	0	1	advanced-stage	1.31128	30	F	validation group
V852	1.745	0.71	1	0	0	1	advanced-stage	1.23895	55	F	validation group
V772	2.447	0.7	1	0	0	1	advanced-stage	1.7129	40	F	training group
V148	2.037	0.66	1	0	0	1	advanced-stage	1.34442	60	M	training group
c230	14.7419	0.634195	1	0	0	1	early-stage	9.34926	45	M	training group
V102	3.248	0.6	1	0	0	1	advanced-stage	1.9488	45	M	validation group
V888	2.494	0.54	1	1	0	1	early-stage	1.34676	55	M	training group
V650	2.423	0.54	1	1	0	1	advanced-stage	1.30842	50	M	training group
V801	2.367	0.37	1	0	0	1	advanced-stage	0.87579	50	M	validation group
a207	0.0677556	17.343	1	0	0	0		1.17508	65	F	validation group
f107	5.20607	3.66477	1	0	0	0		19.079	55	F	validation group
c1431	6.30483	0.802933	1	0	0	0		5.06236	45	F	validation group
m168	1.1371	10.6303	1	0	0	0		12.0878	45	F	validation group
c157	5.05537	0.785855	1	0	0	0		3.97279	50	F	validation group
c1556	3.3648	3.16849	1	0	0	0		10.6613	45	F	validation group
c305	4.22545	1.14881	1	0	0	0		4.85424	30	M	validation group
b2075	4.32189	0.305221	1	0	0	0		1.31913	50	F	validation group
c2478	3.2988	1.96512	1	0	0	0		6.48253	35	F	validation group
n936	3.62492	1.13043	1	1	0	0		4.09774	40	M	validation group
b1963	3.23261	1.46519	1	0	0	0		4.7364	50	M	validation group
c614	3.15612	1.60766	1	0	0	0		5.07396	45	F	validation group
n853	0.0388769	8.32581	1	0	0	0		0.323682	40	M	validation group
b1991	3.7413	0.256354	1	1	0	1	early-stage	0.959097	40	M	validation group
c577	2.84388	1.8744	0.999999	0	0	0		5.33057	35	M	validation group
n392	2.83139	1.87751	0.999999	1	0	1	advanced-stage	5.31596	60	M	validation group
c2661	3.3848	0.646681	0.999999	1	0	0		2.18889	65	M	validation group
d82	3.49842	0.379974	0.999999	1	0	0		1.32931	50	F	validation group
c1890	2.52877	2.44982	0.999999	0	0	0		6.19503	50	M	validation group
c1152	2.95972	1.37613	0.999998	0	0	0		4.07295	65	F	validation group
e670	2.94574	1.37922	0.999998	1	0	0		4.06284	60	M	validation group
e152	0.106552	7.55221	0.999998	0	0	0		0.804705	50	F	validation group
m504	3.31543	0.546523	0.999998	1	0	0		1.81196	60	M	validation group
n265	0.0228789	7.7058	0.999998	0	0	0		0.176301	30	F	validation group
c1852	3.09425	0.972189	0.999998	0	0	0		3.00819	55	F	validation group
b1746	0.158348	7.31862	0.999998	0	0	0		1.15889	55	F	validation group
c2671	2.79412	1.52034	0.999997	0	0	0		4.24802	65	M	validation group
c1467	0.0235988	7.50328	0.999997	0	0	0		0.177069	65	F	validation group
m276	0.112626	7.2935	0.999997	1	0	0		0.821441	35	M	validation group
d531	2.46805	2.14525	0.999997	0	0	0		5.29458	65	F	validation group
c2668	3.07353	0.779443	0.999996	0	0	0		2.39564	30	F	validation group
d46	2.68904	1.45828	0.999995	0	0	0		3.92138	45	M	validation group
c1457	2.9938	0.775435	0.999995	1	0	0		2.3215	65	M	validation group
b1	3.1778	0.338843	0.999994	0	0	0		1.07677	65	M	validation group
e592	2.44904	1.8573	0.999993	0	0	0		4.54861	65	F	validation group
b721	2.32666	2.08927	0.999993	0	0	1	advanced-stage	4.86101	45	M	validation group
c1372	3.10328	0.233177	0.99999	0	0	0		0.723613	35	F	validation group
a331	2.97899	0.415033	0.999987	0	0	0		1.23638	45	M	training group
d310	0.111816	6.65209	0.999987	0	0	0		0.743807	50	M	training group
e1062	2.99249	0.347687	0.999986	0	0	0		1.04045	65	M	training group
b2023	2.53804	1.29724	0.999985	1	0	0		3.29245	40	M	validation group
c2721	0.291667	6.17559	0.999984	0	0	0		1.80121	35	F	validation group
b1580	1.82708	2.77205	0.999982	0	1	0		5.06476	60	M	validation group
d239	2.93799	0.311991	0.999981	0	0	0		0.916627	45	M	validation group
n394	2.83787	0.442105	0.999976	1	0	0		1.25464	45	M	validation group
n558	0.193817	6.18031	0.999975	0	0	0		1.19785	50	F	validation group
d825	2.95409	0.156954	0.999975	1	0	0		0.463657	45	M	training group
c1041	2.69668	0.659574	0.999971	0	0	0		1.77866	30	M	validation group
a1011	2.6397	0.703663	0.999966	0	0	0		1.85746	50	F	validation group
e879	0.0937012	6.23041	0.999964	0	0	0		0.583797	55	F	validation group
n894	2.57739	0.756892	0.999959	0	0	0		1.95081	45	M	validation group
b574	2.33146	1.23222	0.999953	1	0	0		2.87286	45	M	validation group
a470	0.15428	5.86339	0.99994	0	0	0		0.904605	65	F	validation group
e160	0.499694	5.0958	0.999938	0	0	0		2.54634	35	F	validation group
b16	2.71684	0.256198	0.999936	0	0	0		0.69605	65	F	validation group
c1223	0.00605694	6.14545	0.999935	0	0	0		0.0372226	30	F	validation group
b238	1.97424	1.85642	0.999934	1	0	0		3.66503	65	M	validation group
c165	2.76221	0.13556	0.999933	0	0	0		0.374446	55	F	validation group
n1035	2.46773	0.676471	0.999917	0	0	0		1.66935	40	F	validation group
b1864	0.121729	5.78333	0.999917	0	0	0		0.704001	60	F	validation group
c1470	2.33705	0.945921	0.999914	0	0	0		2.21067	60	M	validation group
b1740	2.19621	1.24138	0.999912	0	0	0		2.72633	50	M	validation group
b510	2.38886	0.770921	0.999901	0	0	0		1.84162	60	F	validation group
c2316	2.39892	0.747922	0.999901	0	0	0		1.79421	50	F	validation group
n479	0.881266	4.04103	0.999899	1	0	0		3.56122	50	M	validation group
a189	2.59407	0.252066	0.999884	0	0	0		0.653877	65	F	validation group
e31	2.41627	0.628521	0.999882	0	0	0		1.51868	55	F	validation group
b164	2.60254	0.183844	0.999871	1	0	0		0.478462	50	M	validation group
b840	0.00146735	5.80786	0.999859	0	0	0		0.00852217	55	F	validation group
f96	2.4361	0.451539	0.999841	1	0	0		1.1	30	M	validation group
e412	2.54586	0.194638	0.999835	0	0	0		0.49552	30	F	validation group
c1339	2.35966	0.589984	0.999831	0	0	0		1.39216	30	F	validation group
c2230	1.69881	2.02275	0.999829	1	0	1	early-stage	3.43627	45	M	training group
e154	1.14268	3.19268	0.999812	0	0	0		3.64822	35	F	validation group
d314	0.764265	4.00398	0.999807	0	0	0		3.0601	40	M	validation group
b1665	2.12881	1.02233	0.999803	0	0	0		2.17635	50	F	validation group
b1482	2.45642	0.291616	0.999795	0	0	0		0.716331	50	F	validation group
n237	0.0543375	5.49258	0.999781	0	0	0		0.298453	45	F	validation group
a432	2.40852	0.364532	0.99978	0	0	0		0.877984	65	M	validation group
e351	2.21875	0.756303	0.99977	0	0	0		1.67805	30	F	validation group
b1372	2.39346	0.347054	0.999755	1	0	0		0.830661	40	M	validation group
c2552	0.465692	4.52427	0.999743	0	0	0		2.10692	65	M	validation group
e919	0.398751	4.65438	0.999734	0	0	0		1.85594	60	F	validation group
c2275	2.40771	0.279863	0.999734	0	0	0		0.673831	35	M	validation group
m403	2.28649	0.526908	0.999724	1	0	0		1.20477	35	M	validation group
n224	0.242135	4.96626	0.999717	0	0	0		1.20251	50	F	validation group
c74	2.06545	0.965517	0.999697	0	0	0		1.99423	60	M	validation group
e599	0.747025	3.82437	0.999689	1	0	0		2.8569	65	M	validation group
d343	2.23746	0.576541	0.999687	0	0	0		1.28999	65	M	validation group
n854	0.0892729	5.24311	0.999679	1	0	0		0.468067	40	M	validation group
c1354	2.22114	0.596244	0.999676	0	1	0		1.32434	55	F	validation group
b92	1.39896	2.37739	0.999669	0	0	0		3.32589	65	F	validation group
e844	0.0492958	5.28788	0.999648	0	0	0		0.26067	50	F	validation group
m122	0.0191755	5.33333	0.999632	0	0	0		0.102269	50	M	validation group
d200	1.83509	1.37602	0.99963	1	0	0		2.52512	40	M	validation group
b1926	2.34825	0.236316	0.999611	0	0	0		0.55493	65	F	validation group
a221	2.317	0.27686	0.999587	1	0	0		0.641483	65	M	validation group
c1756	1.92518	1.12562	0.999583	0	0	0		2.16701	35	F	validation group
e207	2.11786	0.688679	0.999566	0	0	0		1.45852	45	F	validation group
c2704	1.70588	1.58458	0.999565	0	0	0		2.70311	30	M	validation group
c1527	0.941986	3.23195	0.999549	1	0	0		3.04445	65	M	validation group
a789	2.29625	0.278297	0.999545	0	0	0		0.639041	40	F	validation group
d680	2.13541	0.625864	0.999542	0	0	0		1.33648	35	F	validation group
d562	0.780409	3.56757	0.999533	1	0	0		2.78416	60	M	validation group
c2678	1.86275	1.16916	0.999488	0	0	0		2.17786	30	F	validation group
n788	1.17494	2.6434	0.999461	0	0	0		3.10585	30	M	validation group
n997	2.01745	0.805797	0.999458	0	0	0		1.62565	35	M	validation group
e1272	1.21255	2.55465	0.999453	0	0	0		3.09764	65	F	validation group
f4	0.969388	3.08293	0.999452	0	0	0		2.98855	55	F	validation group
n183	1.89916	1.03963	0.999428	1	0	0		1.97442	55	M	validation group
e474	1.0331	2.92086	0.999423	1	0	0		3.01753	55	M	validation group
d305	1.36023	2.20278	0.999415	0	0	0		2.99629	40	F	validation group
b274	1.84441	1.11839	0.999375	1	0	0		2.06277	65	M	validation group
a1804	1.57399	1.66787	0.999319	1	0	0		2.62521	65	M	validation group
b623	1.96432	0.784519	0.999267	1	0	0		1.54105	50	M	validation group
c1010	1.83387	1.06809	0.999266	0	0	0		1.95873	40	M	validation group
e81	1.64238	1.43662	0.999183	0	1	0		2.35948	60	F	validation group
m202	2.15222	0.31283	0.999158	1	0	0		0.673279	35	M	validation group
n480	1.69305	1.29026	0.999116	1	0	0		2.18447	60	M	training group
c721	2.12724	0.341629	0.99911	0	0	0		0.726726	35	F	validation group
e931	0.956793	2.8894	0.999108	1	0	0		2.76456	50	M	training group
c2208	2.13407	0.323094	0.999102	0	0	0		0.689505	50	F	validation group
a985	2.19793	0.177868	0.99909	0	0	0		0.390942	35	F	validation group
c1413	0.126394	4.67461	0.999062	0	0	0		0.590843	65	F	validation group
c142	1.47883	1.71906	0.999039	0	0	0		2.54219	30	F	validation group
n1287	0.0488177	4.8021	0.998972	0	0	0		0.234427	30	F	validation group
a236	2.00363	0.538314	0.998956	0	0	0		1.07858	50	F	validation group
b255	1.29212	2.08564	0.998951	1	0	0		2.69489	65	M	validation group
b279	2.07934	0.347607	0.998895	0	0	0		0.722793	65	M	validation group
e185	1.87679	0.787736	0.998892	0	0	0		1.47841	65	F	validation group
c2662	2.05392	0.389722	0.998862	1	0	0		0.800458	65	M	validation group
n690	0.153149	4.52578	0.998855	1	0	0		0.693117	35	M	validation group
f106	1.96166	0.565564	0.998797	0	0	0		1.10945	30	F	validation group
c1682	1.75983	0.985149	0.998744	0	0	0		1.7337	65	F	validation group
e765	1.92488	0.621212	0.998731	0	0	0		1.19576	65	M	validation group
a330	2.08657	0.25817	0.9987	0	0	0		0.538689	30	M	validation group
b1935	2.14192	0.130321	0.998679	0	0	0		0.279138	55	F	validation group
c1825	0.257074	4.22414	0.998648	0	0	0		1.08592	45	F	validation group
b2067	2.10157	0.179384	0.998561	1	0	0		0.376989	50	M	validation group
b567	2.00506	0.377008	0.998521	0	0	0		0.755924	45	F	validation group
f18	1.6312	1.19024	0.998518	0	0	0		1.94152	30	F	validation group
f141	0.0415335	4.64766	0.998505	1	0	0		0.193034	55	M	validation group
a148	1.88449	0.622642	0.998465	0	0	0		1.17336	45	M	validation group
d300	1.47666	1.50696	0.998452	0	0	0		2.22526	35	F	validation group
m445	1.4955	1.45542	0.998416	1	0	0		2.17658	45	M	validation group
d297	0.325072	3.9841	0.998345	1	0	0		1.29512	65	M	validation group
c1874	0.228175	4.19347	0.998339	0	0	0		0.956843	40	F	validation group
c83	1.90788	0.527094	0.998307	0	0	0		1.00563	55	F	validation group
c2084	1.93805	0.446171	0.998249	1	0	0		0.864703	65	M	training group
a846（2a316）	1.56894	1.23033	0.998172	0	0	0		1.9303	30	F	validation group
e1215	0.297248	3.99236	0.998143	0	1	0		1.18672	45	M	validation group
c1442	1.49442	1.37305	0.998092	0	0	0		2.05192	40	F	validation group
c940	1.64123	1.04862	0.998072	0	0	0		1.72103	35	F	validation group
d855	2.02405	0.190981	0.997967	0	0	0		0.386557	45	F	validation group
a754	1.79989	0.67082	0.997929	0	0	0		1.2074	35	F	validation group
a930	1.77778	0.712831	0.997901	0	0	0		1.26726	55	F	validation group
d319	0.238617	4.05169	0.997842	0	0	0		0.966801	30	F	validation group
c1876	0.304563	3.8815	0.997712	0	0	0		1.18216	40	M	validation group
c2834	1.5117	1.25118	0.997703	0	0	0		1.89142	35	F	validation group
c1526	1.90954	0.365427	0.997603	1	0	0		0.697796	65	M	validation group
m16	1.57708	1.08529	0.997581	1	0	0		1.71159	30	M	validation group
n893	0.103672	4.28571	0.997539	1	0	0		0.444307	55	M	validation group
d921	1.9604	0.222887	0.997429	1	0	0		0.436947	45	M	validation group
n1238	0.126621	4.20708	0.997379	1	0	0		0.532704	45	M	validation group
a872	1.65447	0.871401	0.997328	1	0	0		1.44171	60	M	validation group
e782	1.85446	0.435606	0.997326	0	0	0		0.807814	65	M	validation group
b1297	1.35811	1.50055	0.997231	0	0	0		2.03792	45	F	validation group
a309	1.97708	0.147059	0.997196	1	0	0		0.290748	30	M	validation group
b587	1.5277	1.12552	0.997196	0	0	0		1.71946	65	F	validation group
b2039	1.76957	0.596685	0.997183	1	0	0		1.05587	50	M	validation group
a294	1.73138	0.679739	0.997182	1	0	0		1.17689	45	M	validation group
a56	1.97434	0.13253	0.997067	0	0	0		0.261659	30	M	validation group
d18	0.10513	4.19512	0.997018	0	0	0		0.441032	45	F	validation group
c1657	1.92697	0.222772	0.996983	0	0	0		0.429275	50	F	training group
c2875	1.51064	1.12764	0.996972	0	0	0		1.70345	65	F	validation group
e26	0.0624409	4.27289	0.996917	0	0	0		0.266803	35	F	validation group
b1122	0.0716763	4.24023	0.996831	0	0	0		0.303924	60	F	training group
e485	0.867612	2.48058	0.996641	1	0	0		2.15218	65	M	validation group
e831	0.751174	2.72727	0.99659	1	0	0		2.04866	60	M	validation group
b1751	0.00344234	4.3531	0.996572	0	0	0		0.0149849	35	M	validation group
c2962	1.64807	0.768407	0.996545	0	0	0		1.26639	45	F	validation group
c200	1.82796	0.375746	0.996538	0	0	0		0.686847	45	F	validation group
c2680	1.75735	0.518201	0.996451	1	0	0		0.910663	45	M	validation group
b1420	1.82567	0.36938	0.996451	0	0	0		0.674368	45	F	validation group
b1410	0.0903328	4.14581	0.996433	0	0	0		0.374502	60	F	validation group
b1695	0.0963855	4.13241	0.996432	0	0	0		0.398305	55	M	validation group
d8	1.36162	1.36585	0.99634	1	0	0		1.85978	45	M	validation group
d144	1.66783	0.695652	0.996313	1	0	0		1.16023	40	M	validation group
b910	1.73902	0.534483	0.996262	0	0	0		0.929477	55	M	validation group
b369	1.90988	0.160479	0.996246	0	0	0		0.306496	60	M	validation group
b215	1.73828	0.493703	0.995898	1	0	0		0.858193	60	F	validation group
e87	1.33018	1.37852	0.995863	0	0	0		1.83368	30	F	validation group
b1232	1.68631	0.59956	0.995832	0	0	0		1.01104	50	F	validation group
b1938	1.79585	0.350999	0.995739	1	0	0		0.630342	30	M	validation group
c109	-0.0130293	4.28291	0.995674	0	0	0		-0.0558034	60	F	validation group
c30	0.808485	2.49261	0.99566	0	0	0		2.01524	30	F	validation group
c1414	1.81165	0.293309	0.995516	1	0	0		0.531372	60	F	validation group
b629	1.62629	0.696653	0.995513	0	0	0		1.13296	65	M	validation group
n1207	1.82609	0.249017	0.995387	0	0	0		0.454727	30	F	validation group
c2762	1.7	0.518957	0.99534	1	0	0		0.882227	50	M	validation group
b632	0.149296	3.8954	0.995338	0	0	0		0.581566	65	F	validation group
e82	1.10312	1.80106	0.995157	0	0	0		1.98678	35	M	validation group
n649	0.233753	3.68453	0.995055	0	0	0		0.86127	30	M	validation group
b256	0.36373	3.4005	0.995044	0	0	0		1.23687	65	F	validation group
c2521	1.15538	1.67442	0.995019	1	0	0		1.93459	35	M	validation group
d1038	0.145666	3.84946	0.994755	1	0	0		0.560737	60	M	validation group
b1154	1.77932	0.286479	0.994688	0	0	0		0.509737	40	F	validation group
c2691	0.117647	3.9015	0.99465	0	0	0		0.459	35	F	validation group
a649	1.77563	0.288646	0.994619	1	0	0		0.512528	45	M	validation group
c661	1.6501	0.558824	0.994582	0	0	0		0.922114	45	M	validation group
e613	1.44956	0.976948	0.994357	0	0	0		1.41615	65	M	validation group
d369	1.66227	0.508909	0.994297	0	0	0		0.845943	45	F	validation group
m555	0.0750799	3.95895	0.994221	0	0	0		0.297238	40	F	validation group
c2940	1.49928	0.851406	0.99414	0	0	0		1.2765	30	F	validation group
m496	0.215903	3.64545	0.994133	0	0	0		0.787063	50	M	validation group
b1660	0.0379431	4.02481	0.994028	0	0	0		0.152714	55	F	validation group
n1153	1.35019	1.16575	0.994006	1	0	0		1.57398	30	M	validation group
c728	0.826044	2.28507	0.99371	1	0	0		1.88757	35	M	validation group
f100	0.260383	3.48917	0.993318	0	0	0		0.908521	65	F	validation group
b2102	0.334764	3.3253	0.993291	1	0	0		1.11319	65	M	validation group
e1175	0.0844037	3.87006	0.993285	0	0	0		0.326648	35	F	validation group
e531	1.52482	0.730935	0.993246	1	0	0		1.11455	55	M	validation group
c1816	0.242686	3.52217	0.993237	1	0	0		0.85478	45	M	validation group
b301	1.026	1.81078	0.993151	0	0	0		1.85785	50	F	training group
n102	1.48347	0.808858	0.993064	0	0	0		1.19992	45	M	validation group
b1581	0.0939597	3.82696	0.992949	1	0	0		0.35958	45	F	validation group
e792	0.492958	2.95076	0.992834	0	0	0		1.4546	65	M	validation group
d404	1.77252	0.161083	0.99278	0	0	0		0.285523	45	F	validation group
c2563	1.42407	0.912621	0.992665	0	0	0		1.29964	35	M	validation group
b549	1.08456	1.64835	0.992608	0	1	1	advanced-stage	1.78773	60	M	training group
b634	1.70704	0.284519	0.992471	0	0	0		0.485686	60	F	validation group
b968	1.72359	0.246254	0.992434	0	0	0		0.42444	60	F	validation group
e723	1.47636	0.778473	0.992332	0	0	0		1.1493	60	F	validation group
c1376	0.979344	1.84038	0.991984	0	0	0		1.80236	40	F	validation group
c2455	0.270916	3.38081	0.991946	0	0	0		0.915918	65	F	validation group
e513	1.53191	0.633094	0.991912	0	0	0		0.969845	65	F	validation group
a500	1.29633	1.14208	0.991841	0	0	0		1.48051	30	F	validation group
b1802	0.435722	3.01111	0.991753	0	1	1	advanced-stage	1.31201	35	M	training group
n760	0.20316	3.51581	0.991722	1	0	0		0.714273	45	M	validation group
a847	0.561621	2.72361	0.991509	0	0	0		1.52963	55	F	validation group
c2025	1.58154	0.501665	0.991489	1	0	0		0.793404	30	F	validation group
e360	1.47826	0.72409	0.991443	0	0	0		1.07039	45	M	training group
d812	1.55954	0.542347	0.991353	0	0	0		0.845812	30	F	validation group
b1910	1.24891	1.21807	0.991341	0	0	0		1.52126	65	F	validation group
e505	0.0260047	3.87626	0.991252	0	0	0		0.100801	55	F	validation group
c1492	-0.0148699	3.9615	0.99118	0	0	0		-0.0589071	40	F	validation group
d699	1.59377	0.458045	0.991167	0	1	0		0.730018	45	M	validation group
n590	1.4019	0.873786	0.991127	0	0	0		1.22496	45	M	validation group
m281	1.6	0.438695	0.991055	0	0	0		0.701912	35	F	validation group
d323	1.56657	0.493042	0.990687	0	0	0		0.772385	60	M	validation group
n673	0.421159	2.98686	0.990681	0	0	0		1.25794	35	F	validation group
e638	1.72064	0.155873	0.990653	1	0	0		0.268201	65	M	validation group
b962	1.1582	1.3798	0.990637	1	0	0		1.59808	60	M	validation group
b1060	0.0404624	3.80553	0.990469	0	0	0		0.153981	55	F	validation group
c225	1.35484	0.940358	0.990404	0	0	0		1.27403	55	F	validation group
c2764	1.5117	0.580569	0.990015	1	0	0		0.877647	40	M	validation group
V383	0.141	3.49	0.99	0	0	1	advanced-stage	0.49209	50	M	training group
V193	0.375	3.13	0.99	0	0	1	advanced-stage	1.17375	40	M	training group
V429	0.423	3.08	0.99	1	0	1	advanced-stage	1.30284	55	M	training group
V668	0.414	3.03	0.99	1	0	1	advanced-stage	1.25442	50	M	training group
V529	0.513	2.98	0.99	0	0	1	advanced-stage	1.52874	50	M	validation group
V600	0.431	2.95	0.99	1	0	1	advanced-stage	1.27145	45	M	training group
V22	0.54	2.85	0.99	1	0	1	advanced-stage	1.539	45	F	validation group
V115	0.531	2.77	0.99	0	0	1	early-stage	1.47087	60	F	training group
V196	0.591	2.54	0.99	0	0	1	advanced-stage	1.50114	50	M	training group
V336	0.727	2.52	0.99	0	0	1	early-stage	1.83204	60	M	validation group
V667	0.691	2.47	0.99	0	0	1	advanced-stage	1.70677	45	F	training group
V514	0.66	2.4	0.99	0	0	1	advanced-stage	1.584	45	M	validation group
V562	0.638	2.34	0.99	0	0	1	advanced-stage	1.49292	45	M	training group
V380	0.65	2.28	0.99	1	1	1	advanced-stage	1.482	40	F	validation group
V307	0.883	2.22	0.99	1	0	1	advanced-stage	1.96026	30	M	validation group
V608	0.85	1.93	0.99	0	1	1	advanced-stage	1.6405	30	F	training group
V729	0.876	1.92	0.99	1	0	1	advanced-stage	1.68192	30	F	training group
V308	0.844	1.9	0.99	1	0	1	advanced-stage	1.6036	60	M	training group
V169	1.026	1.84	0.99	0	1	1	advanced-stage	1.88784	50	F	training group
V633	1.136	1.71	0.99	1	0	1	advanced-stage	1.94256	55	M	training group
V413	1.085	1.7	0.99	1	0	1	early-stage	1.8445	45	M	validation group
V47	1.107	1.56	0.99	0	0	1	early-stage	1.72692	45	M	validation group
V19	1.15	1.44	0.99	1	1	1	advanced-stage	1.656	55	M	validation group
V156	1.111	1.41	0.99	1	0	1	advanced-stage	1.56651	35	M	validation group
V773	1.384	1.14	0.99	0	0	1	advanced-stage	1.57776	55	M	validation group
V64	1.377	0.92	0.99	0	0	1	advanced-stage	1.26684	40	F	training group
V535	1.538	0.82	0.99	1	0	1	advanced-stage	1.26116	40	M	training group
V686	1.42	0.74	0.99	0	0	1	advanced-stage	1.0508	35	M	training group
V541	1.495	0.71	0.99	1	0	1	advanced-stage	1.06145	55	M	validation group
V687	1.445	0.63	0.99	0	0	1	advanced-stage	0.91035	50	F	training group
V338	1.416	0.62	0.99	0	0	1	advanced-stage	0.87792	50	M	training group
c786	1.29002	1.04472	0.989602	1	0	0		1.3477	45	M	validation group
b1465	1.25357	1.12272	0.989571	0	0	0		1.40741	55	F	validation group
e36	1.19773	1.24296	0.989541	0	0	0		1.48873	40	F	validation group
d928	1.17492	1.28497	0.989364	0	0	0		1.50973	40	F	validation group
b1417	0.0633914	3.6938	0.989095	0	0	0		0.234156	65	F	validation group
c968	1.45786	0.638633	0.98864	1	0	0		0.931037	45	M	validation group
f74	0.666667	2.35889	0.988577	1	0	0		1.57259	60	M	validation group
c4	1.27879	1.02135	0.98846	0	0	0		1.30609	30	F	validation group
c2554	0.431946	2.86516	0.988456	0	0	0		1.23759	65	F	validation group
a990	0.243815	3.27359	0.988425	0	0	0		0.79815	55	F	validation group
m507	0.0347551	3.7238	0.988298	0	0	0		0.129421	60	F	validation group
m538	0.864666	1.90793	0.988073	0	0	0		1.64972	40	F	validation group
n722	1.54358	0.428716	0.98805	0	0	0		0.661756	45	F	validation group
c1608	0.345967	3.03305	0.98796	0	0	0		1.04933	45	M	validation group
c490	1.67038	0.128571	0.987409	1	0	0		0.214764	35	M	validation group
n451	0.526589	2.61818	0.987382	1	0	0		1.37871	60	M	validation group
m588	0.186788	3.35294	0.987239	0	0	0		0.62629	35	M	validation group
m461	0.766719	2.08619	0.987129	0	0	0		1.59952	45	F	validation group
n953	0.228037	3.25217	0.986932	0	0	0		0.741617	35	M	validation group
e674	1.65555	0.137672	0.986757	0	0	0		0.227923	60	F	validation group
c2826	1.55	0.353081	0.986335	1	0	0		0.547275	55	M	training group
c1574	1.63654	0.159119	0.98617	0	0	0		0.260404	65	F	validation group
n1236	1.56217	0.304063	0.98565	0	0	0		0.474997	40	F	validation group
b1703	1.54217	0.347586	0.985649	0	0	0		0.536037	40	M	validation group
c1085	1.51554	0.404255	0.985609	0	0	0		0.612666	30	M	validation group
c1778	0.309832	3.02463	0.98545	0	0	0		0.937128	65	M	validation group
f76	1.40083	0.646003	0.985355	0	0	0		0.90494	55	M	validation group
m32	1.31028	0.823529	0.984717	0	0	0		1.07905	40	F	validation group
c2285	1.5629	0.273038	0.984704	1	0	0		0.426731	40	M	validation group
e1001	0.42077	2.74941	0.984348	0	0	0		1.15687	40	F	validation group
c56	1.31152	0.807882	0.984282	0	0	0		1.05955	40	M	validation group
m57	1.56621	0.252941	0.98427	0	0	0		0.396158	65	F	validation group
n425	1.56291	0.254545	0.984078	0	0	0		0.39783	55	M	validation group
c791	1.61642	0.132114	0.983873	0	0	0		0.213552	35	F	validation group
c1884	1.59028	0.174123	0.983343	0	0	0		0.276904	65	F	validation group
b849	0.0264123	3.5786	0.983314	0	0	0		0.0945192	60	F	validation group
e839	1.43192	0.515152	0.983206	0	0	0		0.737658	65	F	validation group
c2615	0.869516	1.73679	0.983097	1	0	0		1.51016	35	M	validation group
c557	1.36939	0.643541	0.982921	0	0	0		0.881257	45	M	validation group
c2673	1.11765	1.19058	0.982879	0	0	0		1.33065	30	F	validation group
b84	0.956822	1.53831	0.982788	1	0	0		1.47189	50	M	validation group
e465	1.22931	0.941007	0.98264	1	0	0		1.15679	40	M	validation group
a696	1.58221	0.149111	0.981735	0	0	0		0.235924	65	F	validation group
c677	1.55567	0.201357	0.981515	0	0	0		0.313245	45	F	validation group
n109	1.48683	0.347319	0.981357	1	0	0		0.516406	30	M	training group
c1177	1.45556	0.412162	0.981225	0	0	0		0.599925	65	M	validation group
c635	1.36224	0.61244	0.981107	0	0	0		0.834294	45	F	validation group
c1205	1.03089	1.32727	0.980832	1	0	0		1.36827	65	M	validation group
a503	0.850423	1.71311	0.980535	0	0	0		1.45687	60	F	validation group
e722	1.42459	0.460576	0.980438	0	0	0		0.656131	60	F	validation group
n1139	1.34469	0.624309	0.980001	0	0	0		0.839506	65	F	validation group
V712	0.132	3.38	0.98	1	0	1	advanced-stage	0.44616	55	M	validation group
V837	0.493	2.54	0.98	1	0	1	early-stage	1.25222	45	F	validation group
V360	0.69	1.97	0.98	0	0	1	advanced-stage	1.3593	40	M	training group
V188	0.723	1.89	0.98	0	0	1	advanced-stage	1.36647	45	M	validation group
V439	0.906	1.68	0.98	0	0	1	advanced-stage	1.52208	55	M	validation group
V609	0.904	1.67	0.98	1	0	1	advanced-stage	1.50968	55	M	validation group
V65	1.015	1.39	0.98	1	0	1	advanced-stage	1.41085	45	M	training group
V157	1.161	1.11	0.98	1	0	1	advanced-stage	1.28871	65	M	training group
V159	1.287	0.82	0.98	1	1	1	advanced-stage	1.05534	40	M	training group
V519	1.308	0.8	0.98	0	0	1	advanced-stage	1.0464	55	M	training group
V21	1.319	0.76	0.98	1	0	1	advanced-stage	1.00244	50	M	training group
V558	1.296	0.67	0.98	0	1	1	early-stage	0.86832	50	M	validation group
e993	1.3402	0.632319	0.979923	0	0	0		0.847431	40	F	validation group
c478	0.453532	2.56071	0.979823	0	1	0		1.16136	60	F	validation group
e1284	1.4257	0.437194	0.979532	0	0	0		0.623306	65	F	validation group
e1088	1.03856	1.27911	0.979484	1	0	0		1.32843	60	M	validation group
c785	0.519751	2.40854	0.979473	0	0	0		1.25184	50	F	validation group
a271	1.39504	0.490196	0.978915	0	1	0		0.683843	35	F	validation group
b1786	0.472127	2.49167	0.978541	0	0	0		1.17638	40	M	validation group
c2729	0.10049	3.29764	0.97839	0	0	0		0.331381	35	F	validation group
a1024	1.39823	0.470588	0.978332	0	0	0		0.657991	40	F	validation group
c2791	1.1234	1.06872	0.978318	1	0	0		1.20061	35	M	validation group
c1783	1.10504	1.10099	0.977954	0	0	0		1.21663	55	M	validation group
n613	0.676576	2.03329	0.977922	1	0	0		1.37567	55	M	validation group
c1401	0.0570012	3.38038	0.977826	0	0	0		0.192686	35	F	validation group
n777	0.479684	2.45583	0.977626	0	0	0		1.17802	50	M	validation group
a843	0.189083	3.08637	0.977518	1	0	0		0.58358	65	M	validation group
b675	1.2803	0.699256	0.976979	1	0	0		0.895254	60	M	validation group
c755	1.12786	1.02846	0.976843	0	0	0		1.15995	30	F	validation group
c1953	0.105315	3.24401	0.976287	0	0	0		0.341642	30	M	validation group
a295	0.154042	3.13725	0.976254	1	0	0		0.483269	60	M	validation group
m419	1.42523	0.364659	0.976017	0	0	0		0.519721	60	F	validation group
c2135	0.506834	2.35071	0.975299	1	0	0		1.19142	40	M	validation group
b233	1.1355	0.97733	0.97506	0	0	0		1.10976	65	F	validation group
a296	0.649268	2.03595	0.975053	0	0	0		1.32188	60	F	validation group
n84	0.0601972	3.31111	0.974646	0	0	0		0.19932	50	F	validation group
e514	1.25059	0.716547	0.97451	0	0	0		0.896107	30	F	validation group
c1479	1.36803	0.458295	0.974371	0	0	0		0.626961	65	F	validation group
b978	1.48372	0.205863	0.974343	0	0	0		0.305444	65	F	validation group
e821	0.00704225	3.42045	0.974295	1	0	0		0.0240877	55	M	validation group
b1832	1.33447	0.525	0.974018	1	0	0		0.700597	40	F	validation group
a166	1.39082	0.396226	0.973678	0	0	0		0.551081	65	M	validation group
m247	0.0343159	3.34271	0.973263	0	0	0		0.114708	30	F	validation group
m28	0.0642292	3.27647	0.9732	0	0	0		0.210445	50	F	validation group
b1841	1.31968	0.533333	0.972654	0	0	0		0.70383	50	F	validation group
d875	1.34536	0.473917	0.972448	0	0	0		0.637589	55	F	validation group
n257	0.0381316	3.31984	0.972415	1	0	0		0.126591	30	M	validation group
n80	1.35963	0.438889	0.972213	1	0	0		0.596725	65	M	validation group
m488	1.40916	0.32713	0.97198	1	0	0		0.46098	30	M	validation group
e1270	1.03138	1.14845	0.971902	0	0	0		1.18449	65	M	validation group
c1082	1.39764	0.350355	0.971868	0	0	0		0.48967	35	M	validation group
b90	1.21071	0.756705	0.971826	0	0	0		0.916149	55	F	validation group
a422	1.28288	0.596059	0.971615	1	0	0		0.764672	45	M	validation group
b617	1.3615	0.422594	0.971477	1	0	0		0.575363	65	M	validation group
b289	1.39001	0.360202	0.971457	1	0	0		0.500682	65	F	validation group
a802	0.16322	3.02596	0.971116	0	0	0		0.493896	35	M	validation group
n1033	0.302202	2.71373	0.970517	0	0	0		0.820093	40	F	validation group
a408	1.43424	0.246305	0.970363	0	0	0		0.353261	30	M	validation group
c2689	0.52451	2.22698	0.970348	0	0	0		1.16807	65	M	validation group
n1210	1.24638	0.650066	0.970025	0	0	0		0.810227	40	M	validation group
V638	0.187	3	0.97	0	0	1	advanced-stage	0.561	40	M	training group
V509	0.203	2.99	0.97	0	1	1	advanced-stage	0.60697	65	F	validation group
V634	0.349	2.69	0.97	1	0	1	advanced-stage	0.93881	65	M	validation group
V732	1.208	0.79	0.97	1	1	1	advanced-stage	0.95432	45	M	training group
V640	1.341	0.45	0.97	0	0	1	advanced-stage	0.60345	45	F	training group
e353	0.163043	3.007	0.969896	0	0	0		0.490272	60	F	validation group
n546	1.0299	1.11795	0.969801	1	0	0		1.15138	40	M	validation group
c538	1.52912	0.0285714	0.96965	0	0	0		0.0436891	35	F	validation group
c1625	1.35471	0.406365	0.969522	0	0	0		0.550508	40	F	validation group
c2074	0.199747	2.90788	0.968637	1	0	0		0.580841	40	M	validation group
m365	1.32316	0.458943	0.968454	1	0	0		0.607254	40	M	validation group
b1648	1.31702	0.468983	0.96823	0	0	0		0.617662	50	F	validation group
e66	0.734153	1.73768	0.968196	1	0	0		1.27572	60	M	validation group
a1040	0.0247469	3.2794	0.967991	0	0	0		0.0811549	60	F	validation group
b304	1.34142	0.407186	0.967637	0	0	0		0.546207	65	F	validation group
e546	0.070922	3.17122	0.967467	0	0	0		0.224909	60	F	validation group
d778	1.17504	0.764569	0.967296	0	0	0		0.898396	40	F	validation group
b1554	1.06988	0.993344	0.967281	1	0	0		1.06276	65	M	validation group
e469	0.144208	3.00719	0.967157	0	0	0		0.433662	50	F	validation group
c103	1.36808	0.333988	0.966575	1	0	0		0.456922	30	F	validation group
e1118	0.0440661	3.21212	0.966225	0	0	0		0.141546	65	F	validation group
b1818	0.638225	1.91389	0.965903	1	0	0		1.22149	60	M	validation group
b1636	0.0788817	3.12903	0.965698	1	0	0		0.246823	65	M	validation group
c1446	1.28129	0.507791	0.965477	0	0	0		0.650627	40	F	validation group
c1860	1.37897	0.295042	0.965473	0	0	0		0.406854	35	F	validation group
b1863	1.11945	0.858333	0.965341	1	0	0		0.960865	60	F	validation group
n1206	0.12357	3.0249	0.965197	0	0	0		0.373786	30	M	validation group
a837	0.157569	2.9501	0.96514	0	0	0		0.464843	65	F	validation group
b1112	1.03699	1.02193	0.964145	0	0	0		1.05973	65	F	validation group
n538	1.19701	0.670769	0.963937	0	0	0		0.802917	50	F	validation group
d437	0.819876	1.48824	0.96365	0	0	0		1.22017	40	F	validation group
b2025	1.19348	0.665193	0.962907	0	0	0		0.793894	45	F	validation group
d219	1.30211	0.428405	0.962888	0	0	0		0.557831	50	F	validation group
e357	1.38995	0.235294	0.962742	0	0	0		0.327046	65	F	validation group
n157	1.31317	0.400932	0.962619	0	0	0		0.526491	45	F	validation group
b670	0.74078	1.63868	0.961931	0	0	0		1.2139	60	F	validation group
n502	0.12489	2.97641	0.961659	0	0	0		0.371724	45	F	validation group
e1283	0.985198	1.10277	0.961632	0	0	0		1.08645	65	F	validation group
b1519	0.0789578	3.07488	0.961532	0	0	0		0.242785	40	F	validation group
a1828	1.38077	0.238267	0.961375	0	0	0		0.328993	40	F	validation group
c816	0.652807	1.82317	0.961356	0	0	0		1.19018	35	F	validation group
c2720	0.338235	2.50535	0.961127	0	0	0		0.847399	35	F	validation group
b847	1.25605	0.50655	0.961105	0	0	0		0.636254	60	F	validation group
d162	1.04975	0.953804	0.960943	0	0	0		1.00126	45	F	validation group
n1117	1.01443	1.02941	0.960834	0	0	0		1.04426	65	M	validation group
b988	1.38321	0.224104	0.960644	0	0	0		0.309983	45	F	validation group
n358	0.518519	2.10243	0.960266	0	0	0		1.09015	30	F	validation group
c2510	0.876494	1.32267	0.960243	0	0	0		1.15932	50	M	validation group
a1810	1.10085	0.832732	0.960124	0	0	0		0.916711	50	F	validation group
V333	0.117	2.97	0.96	0	0	1	advanced-stage	0.34749	60	M	training group
V883	0.172	2.81	0.96	0	0	1	advanced-stage	0.48332	55	M	training group
V164	0.44	2.3	0.96	0	1	1	advanced-stage	1.012	55	M	training group
V901	0.515	2.1	0.96	0	0	1	advanced-stage	1.0815	35	M	training group
V417	0.72	1.7	0.96	1	0	1	early-stage	1.224	65	M	training group
V5	0.892	1.29	0.96	0	0	1	advanced-stage	1.15068	40	F	validation group
V583	1.026	1.04	0.96	0	1	1	advanced-stage	1.06704	45	M	training group
d361	0.0518732	3.11332	0.959824	0	0	0		0.161498	40	F	validation group
c692	1.33201	0.319005	0.959239	0	0	0		0.424917	40	M	validation group
b36	1.3057	0.376033	0.959217	1	0	0		0.490986	65	M	validation group
d993	0.825083	1.42109	0.959089	1	0	0		1.17252	50	M	validation group
d213	0.956464	1.13388	0.958991	1	0	0		1.08451	40	M	validation group
c2167	1.11276	0.78673	0.958396	1	0	0		0.875439	65	M	validation group
b1545	1.07777	0.856905	0.957866	0	0	0		0.92355	55	F	validation group
b1721	0.0481928	3.09517	0.957542	0	0	0		0.149165	60	F	validation group
b482	0.0364557	3.11581	0.957099	0	0	0		0.113589	30	F	validation group
c2553	0.862767	1.31392	0.956862	0	0	0		1.1336	60	F	validation group
m229	0.148702	2.86819	0.956808	0	0	0		0.426506	50	M	validation group
c2487	0.177955	2.7936	0.955806	0	0	0		0.497135	30	F	validation group
b1767	0.777969	1.48414	0.955531	0	0	0		1.15461	30	F	validation group
b1391	1.20553	0.547215	0.954974	0	0	0		0.659685	35	F	validation group
n504	1.2146	0.525128	0.954752	0	0	0		0.637821	35	F	validation group
c2470	0.926959	1.14244	0.953886	0	0	0		1.059	30	F	validation group
a775	1.33371	0.253375	0.953557	0	0	0		0.337928	65	F	validation group
d839	1.07216	0.815208	0.952803	0	0	0		0.874037	45	F	validation group
d895	0.591065	1.8603	0.952555	0	0	0		1.09956	55	F	validation group
b242	0.225657	2.65491	0.95245	0	0	0		0.599099	65	F	validation group
c1473	1.13259	0.67461	0.951901	0	0	0		0.764057	35	F	validation group
e777	1.10094	0.742424	0.951789	1	0	0		0.817364	45	M	validation group
c1930	1.14764	0.634697	0.951175	0	0	0		0.728402	50	F	validation group
b42	0.891192	1.19008	0.950865	0	0	0		1.06059	65	M	validation group
e98	0.151868	2.79871	0.950737	1	0	0		0.425033	30	M	validation group
a146	1.28797	0.320755	0.950312	0	0	0		0.413124	60	M	validation group
V323	0.818	1.3	0.95	1	1	1	advanced-stage	1.0634	35	F	training group
V430	1.152	0.66	0.95	1	1	1	advanced-stage	0.76032	50	M	training group
V452	1.151	0.58	0.95	0	0	1	advanced-stage	0.66758	60	F	training group
V393	1.191	0.52	0.95	0	0	1	advanced-stage	0.61932	55	F	training group
c1633	1.08455	0.758874	0.949807	0	0	0		0.823035	35	F	validation group
c1545	1.26844	0.354486	0.949388	0	0	0		0.449643	65	F	validation group
n201	0.0743565	2.95277	0.949196	0	0	0		0.219557	55	M	training group
m338	0.02	3.06862	0.948928	0	0	0		0.0613723	40	M	validation group
e892	1.09943	0.714286	0.948511	0	0	0		0.785305	50	F	validation group
b1544	1.27438	0.332779	0.948451	0	0	0		0.424086	45	F	validation group
m18	0.30336	2.44706	0.948441	0	0	0		0.742339	30	F	training group
a389	1.09772	0.714286	0.94811	0	0	0		0.784087	35	F	validation group
n418	1.01686	0.884211	0.94744	0	0	0		0.899119	60	F	validation group
c343	0.494545	2.01984	0.947252	1	0	0		0.998903	35	M	validation group
n1190	0.744365	1.47238	0.946867	0	0	0		1.09598	30	M	validation group
b1911	0.401747	2.2172	0.946732	0	0	0		0.890754	35	F	validation group
d205	0.930079	1.06403	0.946427	0	0	0		0.98963	60	M	validation group
e385	0.0502959	2.97915	0.94636	1	0	0		0.149839	65	M	validation group
b1914	1.31987	0.21199	0.94606	0	0	0		0.279798	40	F	validation group
a349	0.249523	2.54248	0.94604	0	0	0		0.634407	55	M	training group
e932	0.743363	1.46544	0.945847	1	0	0		1.08935	60	M	training group
c1173	1.18611	0.497748	0.945438	1	0	0		0.590384	65	M	validation group
c2753	0.145745	2.76303	0.945427	0	0	0		0.402697	40	F	validation group
d446	1.15528	0.563079	0.945233	0	0	0		0.650514	50	F	validation group
d353	1.21383	0.4334	0.944984	0	0	0		0.526075	40	M	validation group
n899	1.19222	0.47619	0.944494	0	0	0		0.567726	30	M	validation group
e37	0.263009	2.49824	0.944343	1	0	0		0.657058	35	M	validation group
c849	1.40697	0.00660264	0.944264	0	0	0		0.00928972	40	F	validation group
c302	0	3.06746	0.943939	0	0	0		0	45	F	validation group
c750	1.09563	0.680894	0.943841	0	0	0		0.746011	40	F	validation group
b119	1.09539	0.674095	0.942978	0	0	0		0.738396	55	F	validation group
b576	0.312676	2.37657	0.942756	0	0	0		0.743096	55	F	validation group
c97	0.319218	2.35953	0.942423	1	0	0		0.753205	45	M	validation group
e644	1.24263	0.342481	0.941661	0	0	0		0.425576	60	F	validation group
m549	1.06688	0.72478	0.941613	0	0	0		0.773251	45	F	validation group
c396	1.07345	0.707386	0.941238	0	0	0		0.759341	40	M	validation group
m578	0.385725	2.2	0.940639	0	0	0		0.848595	65	M	validation group
n978	0.462305	2.03188	0.940471	1	0	0		0.939351	40	M	validation group
V873	0.173	2.63	0.94	0	0	1	advanced-stage	0.45499	40	F	training group
V3	0.591	1.78	0.94	0	1	1	advanced-stage	1.05198	45	F	training group
V537	0.805	1.28	0.94	0	0	1	early-stage	1.0304	65	F	validation group
c2270	0.30854	2.35267	0.938717	0	0	0		0.725894	35	M	validation group
c406	0.124294	2.75	0.938225	0	0	0		0.341808	40	M	validation group
a383	1.14034	0.536946	0.938144	0	0	0		0.6123	50	F	validation group
n995	0.615576	1.67536	0.937599	0	0	0		1.03131	35	M	validation group
c1107	1.22917	0.337838	0.937413	1	0	0		0.415259	40	M	validation group
c1684	0.801966	1.26733	0.937318	1	0	0		1.01635	65	M	validation group
m454	0.818018	1.23213	0.937286	0	0	0		1.0079	50	F	validation group
c772	1.30561	0.168699	0.937066	0	0	0		0.220256	40	F	validation group
e775	0.420188	2.0947	0.936805	0	0	0		0.880166	60	F	validation group
a798	0.0257127	2.95119	0.936483	0	0	0		0.0758831	50	F	validation group
b626	1.03192	0.759414	0.936382	0	0	0		0.783658	65	F	validation group
m214	1.14914	0.499121	0.935716	0	0	0		0.573561	65	F	validation group
a71	1.10864	0.586345	0.935587	0	0	0		0.650046	35	F	validation group
c2328	0.2354	2.48753	0.93555	0	0	0		0.585565	55	F	validation group
d105	1.25158	0.274457	0.935502	1	0	0		0.343503	50	M	validation group
c645	1.24652	0.282805	0.935147	0	0	0		0.352523	50	M	validation group
f45	1.09913	0.6	0.934643	1	0	0		0.659475	40	M	validation group
c527	1.36307	0.025	0.934609	0	0	0		0.0340768	40	F	validation group
a158	1.23101	0.311321	0.934442	0	0	0		0.38324	50	F	validation group
c2304	1.15513	0.473118	0.933978	0	0	0		0.546515	55	M	validation group
m158	1.08725	0.618182	0.933602	0	0	0		0.672117	60	F	validation group
c1033	1.07074	0.652482	0.933377	0	0	0		0.698639	35	M	validation group
n524	1.08883	0.609231	0.932846	1	0	0		0.663349	30	M	validation group
n951	1.20872	0.347826	0.932799	1	0	0		0.420425	40	M	training group
f97	0.273163	2.38312	0.932541	0	0	0		0.650981	30	F	validation group
c1379	0.0196657	2.93217	0.932131	0	0	0		0.0576631	30	F	validation group
m326	0.238947	2.45444	0.932098	1	0	0		0.586483	45	M	validation group
d984	1.08581	0.610322	0.932085	0	0	0		0.662692	45	F	validation group
e1160	1.14128	0.481529	0.930961	0	0	0		0.549561	55	F	validation group
e595	0.660114	1.52799	0.93078	0	0	0		1.00865	60	F	training group
b1643	0.669995	1.50372	0.930388	0	0	0		1.00749	65	F	validation group
b254	0.51829	1.83375	0.930344	0	0	0		0.950415	65	F	validation group
e1120	0.998498	0.787879	0.930312	0	0	0		0.786695	65	F	validation group
c2515	0.260292	2.38372	0.928638	1	0	0		0.620464	35	M	validation group
n1123	0.657555	1.51373	0.927911	0	0	0		0.995358	65	F	validation group
c2069	0.103666	2.71476	0.927163	0	0	0		0.281429	40	M	validation group
f5	0.418367	2.02927	0.927128	0	0	0		0.84898	65	M	validation group
c1592	0.942663	0.886169	0.926911	1	0	0		0.835358	65	M	training group
c374	0.363465	2.14489	0.926541	0	0	0		0.779591	35	F	validation group
b836	0.972854	0.81441	0.926008	0	0	0		0.792302	55	M	validation group
n279	1.06643	0.608195	0.925637	1	0	0		0.648598	40	M	validation group
c488	1.29616	0.107143	0.925512	0	0	0		0.138874	30	F	validation group
b1525	1.05251	0.62396	0.9234	0	1	0		0.656722	40	M	validation group
d669	1.07969	0.564659	0.923382	1	0	0		0.609656	55	M	validation group
n203	0.15062	2.583	0.922647	0	0	0		0.38905	45	F	validation group
c2892	1.10213	0.510544	0.922559	1	0	0		0.562684	50	M	validation group
a1010	0.734633	1.3083	0.922171	1	0	0		0.961118	60	M	validation group
n401	0.364462	2.11292	0.921946	0	0	0		0.770078	40	M	validation group
d1037	0.821559	1.11589	0.921675	0	0	0		0.916769	65	M	validation group
b1772	0.0826162	2.72276	0.921329	1	0	0		0.224944	65	M	validation group
c1589	0.137998	2.59976	0.920944	0	0	0		0.358761	65	M	validation group
d871	1.18729	0.314766	0.920914	0	0	0		0.373717	45	F	validation group
m561	0.282748	2.2805	0.920289	0	0	0		0.644806	60	F	validation group
V672	0.308	2.2	0.92	0	0	1	advanced-stage	0.6776	35	M	validation group
b851	0.352164	2.12227	0.919138	0	0	0		0.747388	65	M	validation group
e1192	0.13945	2.58344	0.918808	0	0	0		0.360259	60	F	validation group
a336	1.3049	0.0392157	0.917738	0	0	0		0.0511726	55	M	training group
d45	0.0899303	2.68293	0.917426	0	0	0		0.241277	50	F	validation group
m309	0.518947	1.74353	0.916552	0	0	0		0.904801	30	M	validation group
c2709	0.421569	1.94433	0.914637	1	0	0		0.819667	60	M	validation group
c2958	0.105866	2.62918	0.914192	0	0	0		0.27834	40	F	validation group
c2396	0.0826595	2.67867	0.914011	0	0	0		0.221417	45	F	validation group
d422	1.17935	0.28938	0.913792	0	0	0		0.34128	40	F	validation group
n180	0.851541	0.995338	0.912422	0	0	0		0.847571	40	M	validation group
e1003	0.948075	0.784543	0.912317	1	0	0		0.743806	30	M	validation group
c2641	0.30066	2.19254	0.91201	1	0	0		0.659208	65	M	validation group
c1176	0.419444	1.93243	0.911753	1	0	0		0.810548	65	M	validation group
d333	0.561383	1.62227	0.911558	0	0	0		0.910713	45	F	validation group
n895	0.191505	2.42356	0.910825	1	0	0		0.464123	45	M	validation group
a909	0.300495	2.1833	0.910298	0	0	0		0.65607	50	F	validation group
V406	0.543	1.67	0.91	0	0	1	advanced-stage	0.90681	30	M	validation group
e104	0.16534	2.47578	0.909971	0	0	0		0.409345	40	F	validation group
m325	0.793684	1.10686	0.909843	0	0	0		0.878499	35	F	validation group
e253	1.11786	0.400943	0.909836	0	0	0		0.448197	55	F	validation group
a286	1.04519	0.558824	0.909774	0	0	0		0.584079	60	F	validation group
a54	1.15483	0.317269	0.909264	0	0	0		0.366393	65	F	validation group
e46	0.980132	0.697183	0.909174	1	0	0		0.683332	50	M	validation group
e1036	0.929275	0.800937	0.907895	1	0	0		0.74429	55	M	validation group
a267	1.19782	0.215686	0.907804	0	0	0		0.258354	50	F	validation group
m78	0.000988142	2.82059	0.907585	0	0	0		0.00278714	45	F	validation group
n1024	1.04632	0.541176	0.906988	1	0	0		0.566242	45	M	training group
c1779	0.968825	0.70936	0.906884	1	0	0		0.687245	65	M	validation group
a6	1.19418	0.216867	0.906553	0	0	0		0.258979	45	F	validation group
a293	0.306811	2.14706	0.90617	0	0	0		0.658741	30	F	validation group
n156	0.969188	0.703963	0.906024	0	0	0		0.682272	45	M	validation group
m336	0.975789	0.688414	0.905803	0	0	0		0.671747	40	F	validation group
f155	0.0543131	2.69327	0.905494	0	0	0		0.14628	40	F	validation group
n39	0.6767	1.33611	0.905131	0	0	0		0.904146	40	F	validation group
c1343	1.23451	0.120501	0.904943	0	0	0		0.148759	45	F	training group
c76	0.181818	2.41051	0.904524	0	0	0		0.438274	55	F	validation group
b306	1.12132	0.361677	0.903935	1	0	0		0.405554	65	M	validation group
f83	1.15571	0.28385	0.903373	0	0	0		0.328049	60	F	validation group
d252	0.64248	1.39697	0.902517	0	0	0		0.897528	40	F	validation group
d421	0.484472	1.74056	0.902424	0	0	0		0.843251	40	F	validation group
n1045	0.0698557	2.63922	0.901614	0	0	0		0.184364	55	F	validation group
a849	1.04108	0.523992	0.901537	0	0	0		0.545518	65	F	validation group
b896	0.998745	0.614224	0.901154	0	0	0		0.613453	60	F	validation group
e746	0.117471	2.53317	0.901151	0	0	0		0.297575	65	F	validation group
e988	0.641898	1.3911	0.901124	0	0	0		0.892945	65	F	validation group
c2596	1.14286	0.295577	0.900199	1	0	0		0.337802	65	M	validation group
e975	0.931065	0.75644	0.900138	0	0	0		0.704295	40	F	validation group
c1063	1.10182	0.384397	0.900094	0	0	0		0.423537	30	M	validation group
V863	0.129	2.48	0.9	0	0	1	advanced-stage	0.31992	40	M	training group
V737	0.307	2.14	0.9	0	0	1	advanced-stage	0.65698	35	F	training group
V807	1.083	0.43	0.9	0	0	1	advanced-stage	0.46569	50	F	training group
a1826	0.240339	2.25752	0.899549	0	0	0		0.542571	55	F	validation group
c25	0.0412121	2.68966	0.899258	1	0	0		0.110846	40	M	validation group
f17	1.05831	0.473171	0.898904	0	0	0		0.500761	45	F	validation group
b1176	0.643246	1.37617	0.898745	0	0	0		0.885217	35	F	validation group
c310	0.487273	1.71429	0.898441	0	0	0		0.835325	35	M	validation group
f112	0.694888	1.25656	0.897299	0	0	0		0.873166	50	F	validation group
m342	0.792632	1.03937	0.896413	0	0	0		0.823838	40	F	validation group
b171	1.12083	0.32312	0.896083	1	0	0		0.362161	65	M	validation group
d15	0.0227992	2.70603	0.894425	0	0	0		0.0616955	50	F	validation group
b1609	0.133799	2.45906	0.893323	0	0	0		0.32902	55	F	validation group
b1167	0.164275	2.3909	0.892944	0	0	0		0.392765	40	F	validation group
e861	0.260933	2.17561	0.891926	0	0	0		0.567688	45	F	validation group
b1118	0.865896	0.85796	0.891851	0	0	0		0.742904	65	M	validation group
n925	0.155763	2.4029	0.891561	0	0	0		0.374283	40	M	validation group
d327	1.14006	0.258449	0.891313	0	0	0		0.294647	35	F	validation group
m42	0.367589	1.93824	0.890831	0	0	0		0.712474	55	F	validation group
e1123	0.00300451	2.73046	0.890477	0	0	0		0.00820369	50	F	validation group
V99	0.67	1.27	0.89	0	0	1	advanced-stage	0.8509	40	M	validation group
V795	0.724	1.15	0.89	0	0	1	advanced-stage	0.8326	60	F	validation group
a348	0.141311	2.42484	0.889514	0	0	0		0.342657	45	M	validation group
b71	0.00172712	2.72605	0.888922	0	0	0		0.00470821	45	M	validation group
d175	0.0644709	2.58696	0.888383	0	0	0		0.166783	35	F	validation group
n1237	0.959573	0.634338	0.887606	0	0	0		0.608694	35	F	validation group
a916	0.440846	1.76375	0.887582	0	0	0		0.77754	60	F	validation group
c2948	1.06438	0.401606	0.886609	1	0	0		0.427461	40	M	validation group
c673	1.08449	0.357466	0.886533	0	0	0		0.387669	30	M	validation group
c1891	1.1131	0.295042	0.886502	1	0	0		0.32841	30	M	validation group
c861	1.23753	0.0192077	0.885417	0	0	0		0.0237702	45	M	training group
e809	0.253521	2.1553	0.883939	0	0	0		0.546415	45	F	validation group
e1190	0.289908	2.07389	0.883444	0	0	0		0.601236	65	M	validation group
d275	0.0949868	2.49127	0.881834	1	0	0		0.236638	50	M	validation group
a482	0.479774	1.65301	0.881744	0	0	0		0.793069	30	M	validation group
e336	0.233696	2.18347	0.880506	0	0	0		0.510268	65	F	validation group
d380	0.972826	0.568781	0.879284	0	0	0		0.553325	30	M	validation group
b39	1.09154	0.309917	0.879197	1	0	0		0.338286	65	M	validation group
c2616	0.0708661	2.53074	0.878806	0	0	0		0.179344	30	F	validation group
e30	0.908231	0.705986	0.878475	0	0	0		0.641198	60	F	validation group
c2934	0.619456	1.33066	0.8775	1	0	0		0.824283	60	M	validation group
n310	0.894768	0.731114	0.877487	1	0	0		0.654177	45	M	validation group
e171	0.0183711	2.6394	0.877473	0	0	0		0.0484886	60	F	validation group
m483	0.0747762	2.51518	0.877143	0	0	0		0.188076	50	F	validation group
b100	1.08636	0.310345	0.876634	0	0	0		0.337145	65	M	validation group
e1073	0.351527	1.9075	0.875935	1	0	0		0.670537	55	M	training group
n1008	0.533333	1.51014	0.875583	1	0	0		0.805411	45	M	validation group
c1239	0.170806	2.29394	0.874232	0	0	0		0.391818	40	F	validation group
e704	1.07715	0.315394	0.873019	0	0	0		0.339728	45	F	validation group
n813	0.925508	0.641221	0.871946	0	0	0		0.593455	40	M	validation group
e1113	0.675013	1.18341	0.871142	0	1	0		0.798819	35	M	validation group
b1570	0.885116	0.725458	0.871029	1	0	0		0.642114	65	M	validation group
c2582	0.813273	0.880259	0.870623	1	0	0		0.715891	55	M	training group
m581	0.867122	0.762745	0.870559	0	0	0		0.661393	55	F	validation group
m480	0.506582	1.5475	0.870482	0	0	0		0.783938	40	F	validation group
V809	1.062	0.35	0.87	1	0	1	early-stage	0.3717	55	M	training group
d388	1.0986	0.253742	0.869323	0	0	0		0.278762	45	F	validation group
c908	1.21287	0.00060024	0.868236	0	0	0		0.000728012	35	F	validation group
c511	1.12515	0.189286	0.867653	0	0	0		0.212976	30	F	validation group
e1169	0.238532	2.11975	0.867615	0	1	1	early-stage	0.505627	40	M	validation group
c1231	1.16293	0.106061	0.867408	0	0	0		0.123341	35	F	validation group
f139	0.517572	1.50513	0.865832	0	1	0		0.779014	45	F	validation group
b1160	0.0197922	2.58902	0.865828	0	0	0		0.0512424	50	F	validation group
a532	0.731891	1.03552	0.865079	0	0	0		0.757887	35	F	validation group
d53	0.872704	0.726573	0.864479	0	0	0		0.634083	45	F	validation group
c659	0.577535	1.36652	0.863759	0	0	0		0.78921	65	F	validation group
c33	0.117576	2.36617	0.863267	0	0	0		0.278205	65	F	validation group
c2529	0.374502	1.80233	0.86212	0	0	0		0.674975	30	F	validation group
a163	0.764241	0.95283	0.861898	0	0	0		0.728191	50	M	validation group
c544	1.16729	0.075	0.861845	0	0	0		0.0875465	40	F	validation group
a587	1.08783	0.245648	0.861224	1	0	0		0.267224	50	M	validation group
V724	0.268	2.03	0.86	0	1	1	advanced-stage	0.54404	45	M	validation group
V424	0.522	1.46	0.86	0	0	1	advanced-stage	0.76212	55	M	validation group
d1050	0.10894	2.37194	0.859841	0	0	0		0.2584	65	M	validation group
b264	0.892324	0.662469	0.858865	0	0	0		0.591136	65	F	validation group
e403	0.298817	1.95432	0.858731	0	0	0		0.583983	65	F	validation group
e1101	0.11317	2.35726	0.858382	0	0	0		0.26677	65	F	validation group
n240	0.749285	0.968961	0.857532	0	0	0		0.726028	40	F	validation group
e520	0.711584	1.05036	0.857345	0	0	0		0.747419	40	F	validation group
e432	0.881657	0.669315	0.854434	0	0	0		0.590106	65	F	training group
e395	0.622781	1.23138	0.853986	0	0	0		0.76688	55	M	validation group
c1602	0.116618	2.33293	0.853816	0	0	0		0.272061	65	F	validation group
a459	0.828802	0.781421	0.853614	0	0	0		0.647643	60	F	validation group
b750	0.697576	1.06695	0.853556	0	0	0		0.744279	60	M	validation group
n527	0.757256	0.935385	0.853111	0	0	0		0.708326	45	M	validation group
d465	0.543654	1.39944	0.852818	0	0	0		0.760812	45	F	validation group
b212	0.992272	0.418136	0.851584	0	0	0		0.414905	50	F	validation group
c2384	0.567835	1.34072	0.851132	0	0	0		0.761307	35	M	validation group
V694	0.599	1.27	0.85	0	0	1	early-stage	0.76073	60	F	training group
V460	0.723	0.98	0.85	0	0	1	advanced-stage	0.70854	45	F	validation group
V37	0.839	0.73	0.85	0	0	1	advanced-stage	0.61247	40	M	validation group
a836	0.234102	2.06142	0.849451	0	0	0		0.482583	45	M	validation group
m449	0.536937	1.4008	0.849112	1	0	0		0.752143	65	M	validation group
e609	0.941542	0.518112	0.84864	1	0	0		0.487824	50	M	validation group
b963	0.810965	0.801303	0.848318	0	0	0		0.649829	60	F	validation group
c686	1.06362	0.251131	0.848312	1	0	0		0.267108	30	M	validation group
n212	0.800763	0.823212	0.848231	0	0	0		0.659197	65	F	validation group
a475	0.517404	1.43989	0.848137	0	0	0		0.745005	35	F	validation group
c2595	0.827897	0.763754	0.848125	0	0	0		0.632309	65	F	validation group
b1944	1.02074	0.335361	0.845704	1	0	0		0.342317	65	M	validation group
d284	0.949856	0.489066	0.845518	1	0	0		0.464542	55	M	validation group
b1441	0.724247	0.979344	0.845235	0	0	0		0.709287	60	F	validation group
b1011	0.490006	1.48925	0.845192	0	0	0		0.729741	45	F	validation group
m495	0.0400211	2.46817	0.844927	0	1	0		0.0987787	35	F	validation group
a514	0.927563	0.535519	0.844916	0	0	0		0.496728	35	F	validation group
b1514	0.909593	0.569052	0.843293	0	0	0		0.517606	50	F	validation group
e501	0.799054	0.808633	0.842968	0	0	0		0.646142	65	M	validation group
e872	0.781341	0.843902	0.842003	1	0	0		0.659376	45	M	validation group
c873	1.16783	0.00180072	0.841848	0	0	0		0.00210293	45	F	validation group
f64	0.090379	2.34634	0.841381	1	0	0		0.21206	45	M	validation group
n184	0.0907563	2.34499	0.841224	0	0	0		0.212822	55	M	training group
e768	0.192488	2.12121	0.840559	0	0	0		0.408308	45	F	validation group
n511	0.365875	1.74359	0.840537	0	0	0		0.637936	45	F	validation group
d784	1.03156	0.293706	0.840432	1	0	0		0.302977	50	M	validation group
V557	0.303	1.87	0.84	0	0	1	advanced-stage	0.56661	60	F	training group
m421	1.02342	0.308434	0.839544	0	0	0		0.315658	45	F	validation group
d402	0.39441	1.67783	0.839465	1	0	0		0.661754	40	M	training group
m82	0.467391	1.51765	0.839087	0	0	0		0.709335	55	M	validation group
f142	0.720447	0.964652	0.838501	0	0	0		0.694981	45	F	validation group
e889	0.814159	0.75576	0.837053	0	0	0		0.615309	45	F	validation group
b1546	0.852744	0.665557	0.835186	0	0	0		0.56755	60	F	validation group
c1656	0.11236	2.27475	0.83428	0	0	0		0.25559	40	F	validation group
c96	0.859935	0.646365	0.834111	0	0	0		0.555832	35	F	validation group
b205	0.849047	0.670025	0.834097	0	0	0		0.568883	55	M	validation group
c1278	0.132041	2.2303	0.833794	0	0	0		0.294492	65	M	validation group
a447	0.355621	1.74317	0.833705	0	0	0		0.619907	40	M	validation group
d113	0.99089	0.358696	0.833343	0	0	0		0.355428	40	M	validation group
b709	1.05479	0.218916	0.83315	0	0	0		0.230911	35	F	validation group
d170	0.0616678	2.38043	0.832844	0	1	0		0.146796	35	F	validation group
n534	0.278804	1.90564	0.832235	1	0	0		0.5313	55	M	validation group
c754	0.384615	1.6748	0.832099	0	0	0		0.644153	40	F	validation group
m364	0.0431579	2.4162	0.831446	0	0	0		0.104278	55	F	validation group
e63	0.800378	0.765845	0.830978	0	0	0		0.612966	45	M	validation group
b887	0.963614	0.409483	0.830693	1	0	0		0.394583	45	M	validation group
c2497	0.419655	1.59302	0.830407	0	0	0		0.66852	55	F	validation group
c2237	0.374656	1.69056	0.830267	0	0	0		0.633377	35	F	validation group
c2399	0.851752	0.65097	0.830044	0	0	0		0.554465	65	F	validation group
c1732	0.921348	0.492574	0.827905	1	0	0		0.453832	50	M	validation group
c1186	0.729167	0.90991	0.827547	0	0	0		0.663476	35	F	validation group
e830	0.807512	0.738636	0.827334	0	0	0		0.596458	50	F	validation group
d348	0.667435	1.04175	0.826735	0	0	0		0.6953	65	M	validation group
b612	0.123944	2.22385	0.82631	0	0	0		0.275632	45	F	validation group
d83	0.0417986	2.39795	0.824796	0	0	0		0.100231	30	F	validation group
e884	0.926601	0.470046	0.824395	0	0	0		0.435545	60	F	validation group
c2854	0.211702	2.02442	0.823657	0	0	0		0.428573	30	F	validation group
a660	1.00193	0.303694	0.823656	0	0	0		0.304281	35	M	validation group
e1090	0.754131	0.842105	0.823279	0	0	0		0.635058	55	M	validation group
c852	1.13673	0.00840336	0.823087	0	0	0		0.00955235	30	F	validation group
a915	0.0962663	2.27155	0.822302	0	0	0		0.218674	45	M	validation group
c2824	0.0968085	2.26303	0.819927	1	0	0		0.219081	30	M	validation group
c2457	0.50996	1.36337	0.819917	1	0	0		0.695265	45	M	validation group
b939	0.111669	2.2306	0.819904	0	0	0		0.249089	60	F	validation group
c1692	0.992978	0.306931	0.818391	1	0	0		0.304775	65	M	validation group
c683	1.00795	0.269231	0.816717	0	0	0		0.271372	30	M	validation group
c751	0.296258	1.81707	0.816102	0	0	0		0.538322	40	F	validation group
b622	0.0488263	2.34937	0.813951	0	0	0		0.114711	65	F	validation group
c658	0.688867	0.954751	0.813636	1	0	0		0.657696	40	M	validation group
m410	0.436036	1.50522	0.813614	1	0	0		0.656331	55	M	validation group
c2629	0.30443	1.78821	0.812414	0	0	0		0.544383	35	F	validation group
c2451	0.524543	1.30876	0.81236	0	0	0		0.686498	65	M	validation group
e1084	0.503756	1.34928	0.810764	0	0	0		0.679709	45	F	validation group
d242	0.852243	0.5844	0.808709	0	0	0		0.498051	30	F	validation group
a839	0.0877884	2.2476	0.808236	0	0	0		0.197313	35	M	validation group
a833	0.757456	0.786948	0.807394	0	0	0		0.596079	65	M	validation group
b2035	0.706522	0.897238	0.807181	0	0	0		0.633918	45	F	validation group
c1130	1.06528	0.114865	0.806774	1	0	0		0.122363	65	M	training group
c1051	0.942122	0.382979	0.806755	0	0	0		0.360813	50	F	validation group
c669	0.7833	0.728507	0.806651	1	0	0		0.57064	35	M	validation group
c1567	1.00875	0.237454	0.8066	1	0	0		0.239531	65	M	validation group
m517	0.130595	2.14496	0.804994	0	0	0		0.280121	50	F	validation group
n1132	0.424409	1.50276	0.804156	1	0	0		0.637786	65	M	validation group
e1174	0.412232	1.52866	0.803943	0	0	0		0.630164	60	M	validation group
n1149	0.823529	0.632597	0.803779	1	0	0		0.520962	35	M	validation group
e883	0.800625	0.682028	0.803624	0	0	0		0.546048	55	M	validation group
m565	0.0926518	2.22349	0.803576	0	0	0		0.20601	40	F	validation group
b1607	0.845731	0.583127	0.803387	0	0	0		0.493168	30	M	validation group
b653	0.969953	0.311715	0.803067	0	0	0		0.302349	55	F	validation group
m520	0.339126	1.68462	0.80282	0	0	0		0.571299	35	F	validation group
e519	0.108747	2.18417	0.802087	0	0	0		0.237522	60	M	validation group
c1808	0.834532	0.600985	0.801106	0	0	0		0.501542	65	M	validation group
a454	0.204262	1.97268	0.800856	0	0	0		0.402942	65	M	validation group
d1051	0.111308	2.17292	0.800095	0	0	0		0.241864	35	F	validation group
V29	0.174	2.03	0.8	0	0	1	advanced-stage	0.35322	60	M	training group
b1022	0.571102	1.16612	0.798114	0	0	0		0.665976	35	F	validation group
m138	0.912752	0.421212	0.797768	0	0	0		0.384462	60	F	validation group
c1918	0.747024	0.781137	0.797431	0	0	0		0.583528	35	F	validation group
b1202	0.0583869	2.27845	0.796652	0	0	0		0.133032	35	F	validation group
d282	0.411527	1.50696	0.795748	0	0	0		0.620155	50	F	validation group
n657	0.183375	2.00202	0.795126	0	0	0		0.367121	30	F	validation group
c1661	0.942416	0.34901	0.79505	0	0	0		0.328912	30	F	validation group
a850	0.759707	0.738964	0.792202	0	0	0		0.561396	60	F	validation group
n431	0.92607	0.37512	0.791625	0	0	0		0.347387	55	F	validation group
c2195	0.0854214	2.20537	0.791534	0	0	0		0.188386	40	F	validation group
c1227	0.770442	0.712121	0.790942	0	0	0		0.548648	35	F	validation group
d691	0.849611	0.538993	0.790672	0	0	0		0.457934	30	F	validation group
c1420	0.262701	1.81668	0.790564	0	0	0		0.477245	65	F	validation group
e534	0.257683	1.82734	0.790465	0	1	0		0.470874	65	F	validation group
c1789	0.905516	0.416256	0.790306	0	0	0		0.376926	45	M	training group
f98	0.404153	1.50513	0.789269	0	0	0		0.608304	30	M	validation group
e20	0.293283	1.74472	0.788598	0	0	0		0.511696	65	F	validation group
c795	0.984407	0.235772	0.787113	0	0	0		0.232096	50	F	validation group
c828	1.08628	0.0120048	0.786394	0	0	0		0.0130406	50	F	validation group
e750	0.105086	2.14591	0.785421	0	0	0		0.225506	65	F	validation group
e624	0.80807	0.614709	0.785248	0	0	0		0.496728	55	M	validation group
n1027	0.0759301	2.20784	0.784843	0	0	0		0.167642	35	M	validation group
c784	0.743243	0.754065	0.784577	1	0	0		0.560454	50	M	validation group
b1178	0.988619	0.219545	0.784497	0	0	0		0.217046	50	F	validation group
c2426	0.480269	1.32412	0.783619	0	0	0		0.635933	50	F	validation group
e847	0.190141	1.95455	0.783125	0	0	0		0.371639	60	F	validation group
c842	1.0874	0.00060024	0.783058	1	0	0		0.000652701	55	M	validation group
c2774	0.753191	0.727488	0.782742	0	0	0		0.547938	30	F	validation group
c561	0.690816	0.861244	0.781967	0	0	0		0.594961	30	M	validation group
n929	0.0610592	2.23188	0.781724	1	0	0		0.136277	40	M	validation group
d228	0.82058	0.577416	0.78149	1	0	0		0.473816	65	M	validation group
e43	0.051088	2.25	0.780369	0	0	0		0.114948	60	F	validation group
n1028	0.0820046	2.18235	0.780246	0	0	0		0.178963	35	F	validation group
V354	0.325	1.66	0.78	0	0	1	advanced-stage	0.5395	50	F	validation group
b243	0.72746	0.775819	0.779843	1	0	0		0.564377	65	M	validation group
b1704	0.141136	2.05241	0.779799	0	0	0		0.289669	40	F	validation group
c2488	0.377158	1.53488	0.778436	0	0	0		0.578894	30	F	validation group
d309	0.00576369	2.34195	0.777812	0	0	0		0.0134983	50	F	validation group
b210	0.465739	1.34005	0.777695	0	0	0		0.624114	65	M	validation group
n815	0.286682	1.72955	0.777545	0	0	0		0.495831	40	M	validation group
a396	0.218957	1.87685	0.777478	0	0	0		0.410948	65	F	validation group
n340	0.890065	0.414853	0.777224	1	0	0		0.369246	45	M	validation group
c2923	0.180851	1.95782	0.776716	0	0	0		0.354075	30	F	validation group
b1524	0.142124	2.03661	0.77459	1	0	0		0.28945	60	M	validation group
b1822	0.405006	1.46389	0.774476	0	0	0		0.592883	30	F	validation group
e471	0.822695	0.552518	0.77376	0	0	0		0.454554	40	F	validation group
n350	0.162257	1.98976	0.77343	0	0	0		0.322853	55	F	validation group
a353	0.973902	0.222222	0.773357	1	0	0		0.216423	50	M	validation group
c2476	0.528552	1.19186	0.773317	0	0	0		0.629961	35	F	validation group
c2780	0.0191489	2.30095	0.773266	1	0	0		0.0440607	30	M	validation group
c2957	0.974249	0.219545	0.772614	0	0	0		0.213891	35	F	validation group
b1819	0.235495	1.82778	0.772462	0	0	0		0.430432	55	F	validation group
b47	0.355786	1.56513	0.772186	0	0	0		0.556853	65	M	validation group
c1052	0.894962	0.387234	0.77069	0	0	0		0.34656	40	M	validation group
b954	0.389492	1.48664	0.770205	0	0	0		0.579036	60	F	validation group
a437	0.0631888	2.19704	0.770158	0	0	0		0.138829	65	F	training group
V596	0.171	1.97	0.77	0	0	1	early-stage	0.33687	60	F	training group
V783	0.171	1.96	0.77	1	0	1	advanced-stage	0.33516	60	M	training group
V731	0.193	1.91	0.77	1	0	1	advanced-stage	0.36863	60	M	validation group
V771	0.246	1.81	0.77	0	0	1	early-stage	0.44526	55	F	validation group
c2928	0.645745	0.927858	0.769893	0	0	0		0.599159	40	F	validation group
n454	0.0946822	2.1244	0.768569	0	0	0		0.201143	35	F	validation group
c1009	0.629841	0.954008	0.766567	0	0	0		0.600873	30	M	validation group
a450	0.908156	0.346995	0.766178	0	0	0		0.315125	35	M	validation group
c736	0.385686	1.48374	0.765812	0	0	0		0.572258	30	F	validation group
m288	0.324211	1.6153	0.764901	0	0	0		0.523697	40	F	validation group
c700	0.628231	0.952489	0.76458	0	0	0		0.598383	55	F	validation group
e1135	0.756134	0.673046	0.764209	1	0	0		0.508913	65	M	validation group
c418	-0.00753296	2.33239	0.762804	0	0	0		-0.0175698	30	F	validation group
c29	0.666667	0.863711	0.762558	0	0	0		0.575807	30	F	validation group
c1845	0.772817	0.631197	0.76201	0	0	0		0.4878	40	F	validation group
b582	0.319249	1.61715	0.761338	0	0	0		0.516275	55	F	validation group
n320	0.824221	0.516005	0.760705	1	0	0		0.425302	55	M	validation group
e464	0.886525	0.379856	0.760511	0	0	0		0.336752	60	F	validation group
f143	0.814696	0.535918	0.760373	0	0	0		0.43661	60	F	validation group
m537	0.573986	1.05975	0.760246	0	0	0		0.608279	45	M	validation group
a931	0.150247	1.98235	0.760214	1	0	0		0.297843	50	M	validation group
V782	0.397	1.45	0.76	0	0	1	advanced-stage	0.57565	45	M	training group
V95	0.46	1.3	0.76	0	0	1	advanced-stage	0.598	60	F	training group
m81	0.557312	1.09412	0.759469	0	0	0		0.609765	30	F	validation group
n880	0.152628	1.97494	0.759318	0	0	0		0.30143	40	F	validation group
c775	0.903326	0.339431	0.758967	0	0	0		0.306617	50	F	validation group
b253	0.621329	0.952141	0.758428	0	0	0		0.591593	65	F	validation group
f109	0.554313	1.09236	0.756117	0	0	0		0.60551	30	F	validation group
d1054	0.916519	0.303426	0.756021	0	0	0		0.278095	40	M	validation group
c949	0.630979	0.92247	0.754917	0	0	0		0.58206	40	F	validation group
c655	0.873757	0.393665	0.754852	0	0	0		0.343968	55	F	validation group
m20	0.943676	0.241176	0.754753	0	0	0		0.227592	60	M	validation group
f116	0.768371	0.622577	0.754621	0	0	0		0.47837	35	F	validation group
b236	0.0844925	2.11083	0.754262	0	0	0		0.178349	65	F	validation group
n762	0.784424	0.586696	0.754244	1	0	0		0.460218	35	M	validation group
b158	0.0492846	2.18663	0.753908	0	0	0		0.107767	65	F	validation group
f31	0.855685	0.429268	0.75332	0	0	0		0.367318	40	F	validation group
a584	1.05721	-0.00967118	0.753272	0	0	0		-0.0102245	55	F	validation group
a36	0.00855432	2.27309	0.752996	0	0	0		0.0194448	35	F	validation group
c2194	0.316629	1.6019	0.752845	0	0	0		0.507206	55	F	validation group
d196	0.829815	0.484284	0.752781	0	0	0		0.401866	50	M	training group
b1700	0.967298	0.182069	0.751611	0	0	0		0.176115	50	F	validation group
n323	0.283363	1.67093	0.75145	0	0	0		0.473481	40	F	validation group
n114	0.532213	1.12587	0.750134	0	0	0		0.599205	35	F	validation group
V67	0.728	0.69	0.75	1	0	1	advanced-stage	0.50232	60	M	validation group
m27	0.417984	1.37353	0.749689	1	0	0		0.574114	40	F	validation group
b755	0.905163	0.312434	0.749577	0	0	0		0.282803	60	F	validation group
n1221	0.15103	1.95282	0.748861	1	0	0		0.294934	35	M	validation group
e766	0.884977	0.352273	0.747871	0	0	0		0.311753	60	F	validation group
a938	0.140351	1.97149	0.746957	1	0	0		0.2767	65	M	validation group
c2136	0.150342	1.94629	0.74552	0	0	0		0.292608	55	F	validation group
c164	0.117264	2.01768	0.745256	0	0	0		0.236601	40	F	validation group
c650	0.568588	1.03394	0.744841	0	0	0		0.587884	35	F	validation group
d854	0.682131	0.785146	0.744189	0	0	0		0.535572	55	F	validation group
n594	0.644471	0.865465	0.743482	0	0	0		0.557767	55	F	validation group
b1234	0.136899	1.9703	0.743315	0	0	0		0.269732	35	F	validation group
c2138	0.371298	1.45972	0.743239	0	0	0		0.54199	50	F	validation group
a797	0.737842	0.660436	0.742761	0	0	0		0.487298	30	M	validation group
e381	0.247041	1.7279	0.742238	0	0	0		0.426864	65	F	validation group
a435	0.145481	1.94581	0.740871	0	0	0		0.283079	65	M	validation group
b1794	0.810011	0.497222	0.740199	0	0	0		0.402756	45	F	validation group
b972	0.836094	0.439088	0.739631	0	0	0		0.367119	35	F	validation group
d770	0.552367	1.05672	0.739556	1	0	0		0.583698	40	M	validation group
b1873	0.100437	2.03997	0.739205	0	0	0		0.204887	50	F	validation group
c2468	0.0557769	2.13663	0.738957	1	0	0		0.119174	30	M	validation group
n343	0.538507	1.08323	0.737993	1	0	0		0.583325	35	M	validation group
e1008	0.797672	0.517564	0.737425	1	1	0		0.412847	45	F	validation group
a168	0.640823	0.858491	0.737164	0	0	0		0.55014	50	F	validation group
d476	0.646265	0.846369	0.737048	1	0	0		0.546978	40	M	validation group
n867	0.593233	0.9599	0.736217	0	0	0		0.569444	30	M	validation group
c2481	0.265604	1.67151	0.735448	1	0	0		0.443961	60	M	validation group
n945	0.0161994	2.21449	0.735408	0	0	0		0.0358734	35	F	validation group
c672	0.744533	0.626697	0.73461	0	0	0		0.466596	35	M	validation group
b969	0.0982296	2.03388	0.734551	0	0	0		0.199787	50	F	validation group
b490	0.113418	2	0.734205	0	0	0		0.226835	40	F	validation group
b819	0.606016	0.925764	0.733513	0	0	0		0.561028	45	F	validation group
c2301	0.371449	1.43608	0.733319	0	0	0		0.533431	45	F	validation group
m434	0.787387	0.53012	0.733207	0	0	0		0.41741	60	M	training group
c2063	0.524652	1.101	0.732679	1	0	0		0.577642	40	F	validation group
d698	0.52846	1.08983	0.731437	0	0	0		0.575933	45	M	training group
b822	0.253852	1.68777	0.73143	0	0	0		0.428444	65	F	validation group
e549	0.673759	0.771223	0.730473	0	0	0		0.519618	60	F	validation group
e1133	0.734101	0.637959	0.729662	0	0	0		0.468326	30	F	validation group
b357	0.377816	1.41317	0.729405	1	0	0		0.53392	60	M	validation group
b1504	0.927754	0.212978	0.728223	0	0	0		0.197591	45	M	validation group
f110	0.338658	1.49373	0.727352	0	0	0		0.505863	55	F	validation group
c31	0.115152	1.9803	0.727301	0	0	0		0.228034	35	F	validation group
n332	0.764256	0.565941	0.726891	0	0	0		0.432524	35	M	validation group
n1244	0.190694	1.81127	0.725317	1	0	0		0.345399	45	M	validation group
n189	0.386082	1.38462	0.724789	0	0	0		0.534575	55	F	validation group
n1015	0.57555	0.970588	0.724146	1	0	0		0.558623	40	M	validation group
e1074	0.114171	1.97448	0.723815	0	0	0		0.225429	55	F	validation group
n536	0.85664	0.354872	0.722538	0	0	0		0.303997	55	M	validation group
c1002	0.38041	1.39028	0.72184	0	0	0		0.528875	55	M	validation group
e190	0.119643	1.95755	0.721598	0	0	0		0.234207	60	F	validation group
d753	0.784792	0.508159	0.721139	1	0	0		0.398799	45	M	validation group
c1289	0.00486027	2.20501	0.720501	0	0	0		0.0107169	40	F	validation group
V152	0.827	0.41	0.72	1	0	1	advanced-stage	0.33907	45	M	validation group
n752	0.204289	1.76881	0.719638	0	0	0		0.361349	30	M	validation group
b1838	0.391354	1.36111	0.719474	0	0	0		0.532676	60	F	validation group
c1084	0.945338	0.15461	0.71938	0	0	0		0.146159	30	M	training group
c368	0.378182	1.3892	0.719212	1	0	0		0.525372	50	M	validation group
c1889	0.94246	0.159613	0.718819	0	0	0		0.150429	40	F	validation group
a179	0.69462	0.698113	0.718298	0	0	0		0.484924	65	F	validation group
c912	1.0134	0.00360144	0.718137	1	0	0		0.00364972	30	M	validation group
c778	0.629938	0.837398	0.717602	0	0	0		0.527509	45	F	validation group
d295	0.780403	0.508946	0.717238	0	0	0		0.397183	50	F	validation group
c597	0.462245	1.19976	0.716357	0	0	0		0.554583	40	F	validation group
e1077	0.564847	0.976077	0.716236	0	0	0		0.551334	65	F	validation group
c1515	0.40708	1.31947	0.716174	1	0	0		0.537131	40	M	validation group
a869	0.716939	0.642994	0.715382	0	0	0		0.460987	50	F	validation group
e784	0.401408	1.32955	0.715153	1	0	0		0.533691	55	M	validation group
e703	0.572424	0.956195	0.714719	0	0	0		0.547349	55	M	validation group
b1582	0.850375	0.349418	0.714026	0	0	0		0.297136	50	F	validation group
e848	0.748826	0.568182	0.712964	1	0	0		0.425469	60	M	validation group
e506	0.70922	0.653237	0.712429	1	0	0		0.463289	60	M	validation group
b1506	0.731149	0.602329	0.711001	0	0	0		0.440392	40	F	validation group
e1108	0.875313	0.287081	0.710398	0	1	0		0.251286	45	F	validation group
V445	0.283	1.58	0.71	1	0	1	advanced-stage	0.44714	30	M	validation group
V739	0.541	1.02	0.71	0	1	1	advanced-stage	0.55182	45	F	validation group
c1624	0.563654	0.964504	0.709849	0	0	0		0.543647	45	F	validation group
c845	0.991957	0.0306122	0.709273	0	0	0		0.030366	50	F	validation group
n488	0.560246	0.970256	0.709092	0	0	0		0.543583	40	F	validation group
d551	0.857786	0.321229	0.708574	0	0	0		0.275546	35	M	validation group
n444	0.883268	0.264115	0.707833	0	0	0		0.233284	45	F	validation group
m64	0.660079	0.75	0.707785	1	0	0		0.495059	40	M	validation group
c1855	0.230159	1.68319	0.706437	0	0	0		0.387401	45	F	validation group
c2456	0.193891	1.76163	0.706192	1	0	0		0.341564	65	M	validation group
c326	0.930909	0.156746	0.706176	0	0	0		0.145916	30	M	validation group
e406	0.627219	0.816286	0.705379	0	0	0		0.51199	65	M	validation group
b1652	0.481278	1.134	0.705345	0	0	0		0.545767	60	F	validation group
e337	0.694293	0.669468	0.705029	1	0	0		0.464807	65	M	validation group
e739	0.138377	1.87735	0.703827	0	0	0		0.259782	65	F	validation group
c482	0.998761	0.00357143	0.703688	0	0	0		0.003567	55	M	validation group
n216	0.29552	1.52497	0.699119	1	0	0		0.450657	30	M	validation group
n680	0.407053	1.2821	0.699119	1	0	0		0.521884	30	M	validation group
b413	0.636453	0.78243	0.699046	0	0	0		0.49798	50	F	validation group
a497	0.259643	1.60109	0.698194	0	0	0		0.415712	30	F	validation group
a256	0.76588	0.498084	0.697877	0	0	0		0.381473	35	F	validation group
c2545	0.734533	0.565264	0.697376	1	0	0		0.415205	65	M	validation group
m527	0.0989995	1.94907	0.697348	0	0	0		0.192957	40	F	validation group
a164	0.438291	1.20755	0.696082	0	0	0		0.529257	55	F	validation group
d789	0.842181	0.32634	0.695269	1	0	0		0.274838	45	M	validation group
b1677	0.240639	1.63524	0.694824	0	0	0		0.393502	45	F	validation group
c1214	0.701393	0.630303	0.694054	0	0	0		0.44209	65	M	validation group
c653	0.536779	0.988688	0.694026	1	0	0		0.530707	50	F	validation group
b1530	0.228188	1.65724	0.692432	0	1	0		0.378162	40	F	validation group
f32	0.494169	1.07805	0.692423	1	0	0		0.532738	40	M	validation group
n380	0.85214	0.296651	0.691521	1	0	0		0.252788	55	M	validation group
n1032	0.110858	1.9098	0.691061	0	0	0		0.211717	35	F	validation group
a303	0.44303	1.18627	0.690953	1	0	0		0.525555	35	M	validation group
c2823	0.857447	0.281991	0.690059	0	0	0		0.241792	40	F	validation group
V841	0.462	1.14	0.69	0	0	1	advanced-stage	0.52668	55	M	validation group
V819	0.483	1.09	0.69	1	1	1	advanced-stage	0.52647	35	M	training group
n1205	0.535469	0.982962	0.689998	0	0	0		0.526346	35	F	validation group
a308	0.173138	1.77124	0.689673	0	0	0		0.306669	35	M	validation group
e628	0.539058	0.972558	0.688777	0	0	0		0.524265	65	M	validation group
n252	0.182078	1.74899	0.688357	0	0	0		0.318453	50	M	validation group
e502	0.408983	1.25468	0.688249	0	1	0		0.513142	30	F	validation group
b694	0.877766	0.233794	0.688194	0	0	0		0.205216	50	F	validation group
m230	0.239331	1.62039	0.686495	0	0	0		0.387809	50	M	validation group
d322	0.382709	1.30815	0.686479	0	0	0		0.500641	30	F	validation group
b249	0.783101	0.435768	0.686226	1	0	0		0.341251	65	M	validation group
c869	0.979088	0.0090036	0.686223	0	0	0		0.00881532	35	M	validation group
b1831	0.499431	1.05278	0.685904	1	0	0		0.52579	35	M	training group
n219	0.796949	0.404858	0.685867	0	0	0		0.322652	50	M	validation group
e509	0.238771	1.62014	0.685801	0	0	0		0.386843	65	F	validation group
b1788	0.458476	1.13889	0.684446	0	1	0		0.522153	30	F	validation group
c469	0.0793061	1.96071	0.68263	0	0	0		0.155497	55	F	validation group
c1571	0.371234	1.32436	0.682302	1	0	0		0.491647	65	M	validation group
a119	0.22943	1.63208	0.681796	0	0	0		0.374448	65	F	validation group
c2811	0.48617	1.07109	0.680869	0	0	0		0.520732	65	M	validation group
V568	0.167	1.76	0.68	0	0	1	advanced-stage	0.29392	40	M	validation group
e446	0.498521	1.04071	0.6792	1	0	0		0.518818	65	M	validation group
c2110	0.874036	0.221631	0.678526	0	0	0		0.193714	50	F	validation group
c724	0.805169	0.371041	0.678262	0	0	0		0.29875	30	F	validation group
n920	0.516919	0.997494	0.677682	0	0	0		0.515623	35	F	validation group
c2044	0.111252	1.88013	0.677347	0	0	0		0.209168	30	F	validation group
e929	0.700677	0.59447	0.676288	0	0	0		0.416531	40	F	validation group
m33	0.119565	1.85882	0.675801	0	0	0		0.222251	65	F	validation group
a394	0.802351	0.369458	0.674541	1	0	0		0.296435	40	M	validation group
n917	0.49388	1.0401	0.674034	0	0	0		0.513685	45	F	validation group
b1013	0.726442	0.531596	0.673014	0	0	0		0.386174	45	F	validation group
c678	0.875746	0.205882	0.672719	0	0	0		0.180301	55	F	validation group
d177	0.288718	1.4837	0.67251	0	0	0		0.428369	50	F	validation group
b1668	0.638043	0.722084	0.672044	0	0	0		0.460721	60	M	validation group
n740	0.513544	0.992366	0.671649	1	0	0		0.509624	30	M	validation group
d514	0.114311	1.86034	0.670991	0	0	0		0.212658	45	F	validation group
b1657	0.445332	1.13896	0.670706	0	0	0		0.507214	35	F	validation group
e629	0.0341438	2.03293	0.670033	0	0	0		0.069412	30	F	validation group
V458	0.455	1.11	0.67	1	0	1	advanced-stage	0.50505	65	M	validation group
a1004	0.644678	0.702183	0.66939	0	0	0		0.452682	45	M	validation group
d654	0.206111	1.65647	0.669054	0	0	0		0.341417	35	M	validation group
e481	0.621749	0.751079	0.668888	0	0	0		0.466983	60	F	validation group
d616	0.517061	0.978663	0.668706	0	0	0		0.506029	35	M	validation group
b102	0.117444	1.84483	0.666752	0	0	0		0.216664	45	M	validation group
c1775	0.0517986	1.98768	0.666711	0	0	0		0.102959	65	F	validation group
b749	0.55216	0.896918	0.666106	0	0	0		0.495242	55	M	training group
m298	0.252632	1.54781	0.665453	0	0	0		0.391025	65	M	validation group
b44	0.583765	0.825944	0.665049	0	0	0		0.482157	65	F	validation group
c720	0.845924	0.253394	0.664213	0	0	0		0.214352	50	F	validation group
e490	0.8487	0.244604	0.662862	0	0	0		0.207596	35	F	validation group
n530	0.0958663	1.88103	0.661452	1	0	0		0.180327	40	M	validation group
m203	0.66256	0.646749	0.661299	0	0	0		0.42851	40	F	validation group
n619	0.662307	0.646325	0.660817	1	0	0		0.428065	55	M	validation group
b1674	0.374438	1.27295	0.660718	1	0	0		0.476642	60	M	validation group
V833	0.471	1.06	0.66	1	1	1	advanced-stage	0.49926	50	M	training group
c654	0.779324	0.38914	0.659641	1	0	0		0.303266	40	M	validation group
c2531	0.10093	1.86628	0.659613	0	0	0		0.188363	35	F	validation group
m530	0.762507	0.425073	0.659301	0	0	0		0.324121	65	F	validation group
a231	0.672716	0.619835	0.658927	0	0	0		0.416973	35	M	validation group
n90	0.0197198	2.04167	0.658898	0	0	0		0.0402612	45	F	validation group
b856	0.202008	1.6444	0.658729	0	0	0		0.33218	65	F	validation group
c450	-0.0207156	2.125	0.65656	0	0	0		-0.0440207	40	M	validation group
e1147	0.19329	1.65869	0.656404	0	0	0		0.320609	45	F	validation group
a474	0.231421	1.57377	0.655463	1	0	0		0.364203	35	M	validation group
c1768	0.407674	1.18966	0.655301	1	0	0		0.484991	60	M	validation group
e167	0.881813	0.157158	0.655267	0	0	0		0.138584	55	F	validation group
b351	0.171577	1.70299	0.654923	0	0	0		0.292195	60	F	validation group
c893	0.944772	0.0186074	0.654542	0	0	0		0.0175798	65	F	validation group
d713	0.147394	1.75321	0.653705	0	0	0		0.258412	50	M	validation group
e356	0.672554	0.609244	0.653488	0	0	0		0.409749	40	M	validation group
e828	0.687793	0.575758	0.653337	0	0	0		0.396002	60	M	validation group
e796	0.0492958	1.96591	0.653253	1	0	0		0.096911	60	M	validation group
d17	0.670044	0.613607	0.652938	0	0	0		0.411144	45	M	validation group
c1421	0.0173482	2.03483	0.652932	0	0	0		0.0353007	65	M	validation group
c744	0.388773	1.22561	0.652708	0	0	0		0.476484	30	F	validation group
e305	0.432065	1.13025	0.652163	1	0	0		0.488343	45	M	validation group
e1076	0.0340511	1.99681	0.652107	0	0	0		0.0679935	45	M	validation group
n400	0.0505837	1.95981	0.651606	1	0	0		0.0991343	35	M	validation group
b569	0.752405	0.431107	0.651359	0	0	0		0.324367	60	F	validation group
a893	0.00450197	2.05758	0.65032	0	0	0		0.00926317	60	F	validation group
c813	0.266112	1.4878	0.650258	0	0	0		0.395923	50	F	validation group
c2559	0.529809	0.912621	0.649763	0	0	0		0.483515	65	F	validation group
d155	0.480729	1.01902	0.649527	0	0	0		0.489873	65	F	validation group
d3	0.635845	0.680359	0.649077	0	0	0		0.432603	45	F	validation group
d87	0.804307	0.313222	0.648918	0	0	0		0.251927	30	M	validation group
e497	0.281324	1.45036	0.64809	0	0	0		0.408021	55	F	validation group
e660	0.140368	1.7572	0.648044	0	0	0		0.246655	60	F	validation group
n357	0.781893	0.359795	0.647797	0	0	0		0.281321	50	F	validation group
c2908	0.0861702	1.87347	0.64717	0	0	0		0.161438	50	F	validation group
e232	0.398214	1.1934	0.646865	0	0	0		0.475227	55	F	validation group
c2906	0.391489	1.20755	0.646617	0	0	0		0.472742	35	F	validation group
a739	0.771381	0.380062	0.646477	0	0	0		0.293173	35	M	validation group
c133	-0.0260586	2.11591	0.646195	0	0	0		-0.0551378	40	F	validation group
n95	0.7507	0.424242	0.646049	0	1	0		0.318479	50	F	validation group
e555	0.727367	0.474204	0.645622	1	0	0		0.34492	65	M	validation group
b1366	0.856065	0.19209	0.644677	0	0	0		0.164442	50	F	validation group
a335	0.789306	0.336601	0.644244	0	0	0		0.265681	50	F	validation group
a253	0.169389	1.68391	0.642954	0	0	0		0.285235	55	M	validation group
d506	0.411341	1.15642	0.642632	1	0	0		0.475685	55	M	validation group
m553	0.158147	1.70582	0.641652	1	0	0		0.26977	65	M	validation group
e494	0.260047	1.48201	0.640682	0	0	0		0.385394	45	F	validation group
n221	0.538608	0.874494	0.640196	0	0	0		0.47101	30	F	validation group
f88	0.140912	1.73899	0.639443	0	0	0		0.245044	30	M	validation group
e1045	0.186213	1.63934	0.638934	0	0	0		0.305267	60	F	training group
c2334	0.553459	0.839335	0.638763	1	0	0		0.464538	45	M	validation group
c1996	0.548228	0.850494	0.638645	0	0	0		0.466265	35	F	validation group
b1233	0.765186	0.377338	0.638272	0	0	0		0.288733	35	F	validation group
e966	0.0281104	1.98157	0.637894	0	0	0		0.0557026	65	F	validation group
n568	0.0380499	1.95839	0.637114	0	0	0		0.0745167	55	F	validation group
b600	0.798122	0.299163	0.634982	0	0	0		0.238769	55	F	validation group
c1065	0.750268	0.4	0.633262	0	0	0		0.300107	40	F	validation group
b2002	0.395652	1.17127	0.632801	0	0	0		0.463416	50	M	validation group
b1479	0.00158479	2.02916	0.632706	0	0	0		0.00321579	55	F	validation group
b1472	0.00158479	2.02673	0.631461	0	0	0		0.00321194	60	F	validation group
m118	0.866731	0.142424	0.631223	0	0	0		0.123443	35	F	validation group
c1197	0.886735	0.0969697	0.630251	0	0	0		0.0859865	65	F	validation group
V194	0.206	1.57	0.63	0	0	1	advanced-stage	0.32342	45	M	training group
V604	0.615	0.68	0.63	0	0	1	advanced-stage	0.4182	35	M	training group
e1002	0.0993733	1.80796	0.628465	0	0	0		0.179663	30	F	validation group
c1751	0.354916	1.25123	0.628315	0	0	0		0.444082	65	F	validation group
b1621	0.765851	0.354839	0.627498	0	0	0		0.271754	30	M	validation group
a485	0.412041	1.12295	0.626311	0	0	0		0.462702	50	F	validation group
d598	0.0305098	1.95306	0.625965	0	0	0		0.0595875	40	F	validation group
e189	0.621429	0.665094	0.625321	1	0	0		0.413309	60	M	validation group
b1526	0.444532	1.04992	0.625132	0	0	0		0.466722	30	M	validation group
c765	0.865904	0.132114	0.624992	0	0	0		0.114398	45	F	validation group
a791	0.730017	0.42783	0.6249	0	0	0		0.312323	55	M	validation group
b1760	0.0240964	1.96414	0.624475	0	0	0		0.0473286	45	F	validation group
a939	0.34368	1.26816	0.624429	0	0	0		0.435841	60	F	validation group
b756	0.297155	1.36876	0.624061	0	1	1	advanced-stage	0.406733	50	M	validation group
c1038	0.551983	0.811348	0.622755	0	0	0		0.44785	35	M	validation group
a1006	0.462769	1.00437	0.622112	0	0	0		0.464789	55	F	validation group
a123	0.356013	1.23585	0.621605	0	0	0		0.439978	45	F	validation group
d101	0.875964	0.103261	0.621397	0	0	0		0.0904528	40	F	validation group
a235	0.61343	0.67433	0.621089	0	0	0		0.413654	30	F	validation group
c2807	0.488298	0.945498	0.620412	0	0	0		0.461684	30	M	validation group
a423	0.424688	1.08374	0.620275	0	0	0		0.460253	30	F	validation group
c905	0.920107	0.00420168	0.619873	0	0	0		0.003866	30	F	validation group
e522	0.312057	1.32662	0.61904	0	0	0		0.41398	65	F	validation group
a481	0.150517	1.6776	0.618639	0	0	0		0.252507	40	F	validation group
c2911	0.107447	1.77137	0.618631	1	0	0		0.190328	50	M	validation group
e472	0.810875	0.238849	0.618208	0	0	0		0.193677	45	M	validation group
n1030	0.127563	1.72549	0.617553	0	1	0		0.220108	60	F	validation group
c2603	0.0539933	1.88565	0.617535	0	0	0		0.101813	65	F	validation group
d483	0.229523	1.50279	0.617199	0	0	0		0.344926	35	F	validation group
e834	0.103286	1.77652	0.616597	0	0	0		0.18349	55	F	validation group
c606	0.0857143	1.81459	0.6165	0	0	0		0.155537	40	F	validation group
c652	0.822068	0.210407	0.61609	1	0	0		0.172969	35	M	validation group
n928	0.161994	1.64638	0.615396	0	0	0		0.266703	30	F	validation group
c2933	0.671277	0.537181	0.615271	1	0	0		0.360597	30	M	validation group
c688	0.478131	0.954751	0.613705	0	0	0		0.456496	30	F	validation group
c1715	0.691011	0.487624	0.611831	1	0	0		0.336953	65	M	validation group
c2900	0.0702128	1.83574	0.609912	0	0	0		0.128892	30	F	validation group
c807	0.512474	0.871951	0.609508	0	0	0		0.446852	40	M	validation group
d536	0.810981	0.22067	0.608834	1	0	0		0.17896	55	M	validation group
a192	0.485178	0.929752	0.608651	0	0	0		0.451096	60	F	validation group
m155	0.11697	1.7303	0.608012	0	0	0		0.202394	55	M	training group
c712	0.733598	0.386878	0.607631	0	0	0		0.283813	30	F	validation group
c989	0.104784	1.75558	0.607353	0	0	0		0.183956	40	F	validation group
c2500	0.00265604	1.97674	0.606711	1	0	0		0.00525032	50	M	training group
a17	0.107784	1.74699	0.606269	0	0	0		0.188298	60	F	validation group
d979	0.654565	0.554974	0.605529	0	0	0		0.363267	55	M	validation group
c723	0.567594	0.744344	0.605525	0	0	0		0.422485	35	M	validation group
e223	0.0428571	1.88679	0.605441	0	0	0		0.0808625	60	F	validation group
b415	0.439409	1.02128	0.604372	1	0	0		0.448758	40	M	validation group
c1212	0.717141	0.415152	0.603652	1	0	0		0.297722	65	M	validation group
b2110	0.562232	0.752343	0.603588	0	0	0		0.422991	65	M	validation group
e1185	0.370642	1.16943	0.603535	1	0	0		0.433439	55	M	validation group
b57	0.701209	0.448276	0.602825	0	0	0		0.314335	35	F	validation group
b512	0.76962	0.299239	0.602787	1	0	0		0.230301	60	M	validation group
c773	0.808732	0.213415	0.602439	0	0	0		0.172595	35	M	validation group
e626	0.659079	0.535675	0.600535	0	0	0		0.353052	60	F	validation group
b621	0.483568	0.916318	0.599726	0	0	0		0.443102	45	M	validation group
b1645	0.25362	1.41687	0.599645	1	0	0		0.359347	65	M	validation group
c699	0.505964	0.866516	0.599179	0	0	0		0.438426	65	M	validation group
a822	0.416432	1.06142	0.599152	0	0	0		0.44201	55	F	validation group
b1511	0.389262	1.1198	0.598738	0	0	0		0.435895	50	F	validation group
b1505	0.294512	1.32446	0.597861	0	0	0		0.39007	35	F	validation group
c1871	0.320437	1.26723	0.597448	0	0	0		0.406067	65	F	validation group
b658	0.403756	1.08577	0.597432	1	0	0		0.438388	60	M	validation group
e731	0.243902	1.43179	0.596339	0	0	0		0.349217	65	F	validation group
c857	0.861126	0.0876351	0.596254	0	0	0		0.0754648	35	M	validation group
a604	0.174053	1.58221	0.595447	0	0	0		0.275388	35	M	validation group
b876	0.10665	1.72845	0.595168	1	0	0		0.184339	55	M	validation group
m312	0.356842	1.1811	0.59381	0	0	0		0.421467	40	F	validation group
n1127	0.42221	1.03867	0.593762	0	0	0		0.438539	65	M	validation group
a478	0.178739	1.56831	0.593485	0	0	0		0.280318	35	M	validation group
c233	0.516129	0.833002	0.593143	0	0	0		0.429937	35	M	validation group
c1770	0.642686	0.55665	0.59273	0	0	0		0.357751	65	F	validation group
c2231	0.716253	0.395904	0.592436	0	0	0		0.283568	50	F	validation group
a487	0.20508	1.5082	0.592021	0	0	0		0.309301	60	F	validation group
b1997	0.05	1.8453	0.591714	1	0	0		0.0922652	50	M	validation group
b1579	0.161863	1.60067	0.591151	1	0	0		0.259089	35	M	validation group
e994	0.647269	0.543326	0.590951	0	0	0		0.351678	30	F	validation group
b374	0.518198	0.823952	0.590724	0	0	0		0.42697	45	F	validation group
c2519	0.366534	1.15407	0.590656	0	0	0		0.423006	40	F	validation group
e1097	0.349524	1.18979	0.589955	0	0	0		0.415861	50	M	validation group
e842	0.183099	1.54924	0.588388	0	0	0		0.283664	50	F	validation group
b2087	0.291845	1.31191	0.588103	1	0	0		0.382876	40	M	validation group
c1704	0.219101	1.4703	0.588094	0	0	0		0.322144	65	F	validation group
c1076	0.294748	1.30496	0.587767	0	0	0		0.384636	30	M	training group
d607	0.00080289	1.94452	0.587499	0	0	0		0.00156124	35	F	validation group
b1084	0.0855491	1.75977	0.587382	0	0	0		0.150547	30	F	validation group
n326	0.482069	0.896287	0.587346	0	0	0		0.432072	60	F	validation group
f129	0.535144	0.779932	0.586926	1	0	0		0.417376	50	M	training group
m191	0.041355	1.85237	0.585443	0	0	0		0.0766049	45	F	validation group
e631	0.690119	0.439078	0.585111	1	0	0		0.303016	65	M	validation group
b812	0.247982	1.40175	0.585069	0	0	0		0.347609	45	F	validation group
c2551	0.134983	1.64617	0.584197	0	0	0		0.222205	65	F	validation group
c2311	0.560647	0.717452	0.583211	0	0	0		0.402237	50	M	validation group
n499	0.329815	1.21846	0.582342	0	0	0		0.401867	35	F	validation group
n185	0.188751	1.52497	0.581988	0	0	0		0.287839	45	F	validation group
a684	0.688588	0.436389	0.581886	1	0	0		0.300492	60	M	validation group
c1616	0.719145	0.369645	0.581775	0	0	0		0.265828	35	F	validation group
b1321	0.835952	0.114609	0.581405	0	0	0		0.0958073	35	F	validation group
c2910	0.182979	1.53607	0.581203	1	0	0		0.281068	50	M	validation group
d929	0.289329	1.30441	0.581159	0	0	0		0.377404	30	F	validation group
c2860	0.298936	1.28302	0.580904	1	0	0		0.383541	50	M	validation group
d171	0.711983	0.383152	0.580656	0	0	0		0.272798	60	F	validation group
V855	0.134	1.64	0.58	0	0	1	advanced-stage	0.21976	60	F	training group
V829	0.134	1.64	0.58	1	0	1	early-stage	0.21976	45	M	validation group
V804	0.443	0.97	0.58	1	0	1	advanced-stage	0.42971	45	M	training group
c674	0.753479	0.28733	0.577722	0	0	0		0.216497	35	F	validation group
c704	0.640159	0.533937	0.577643	0	0	0		0.341804	30	F	validation group
d407	0.343168	1.18033	0.57748	0	0	0		0.40505	45	M	validation group
a473	0.0545626	1.80874	0.57747	0	0	0		0.0986897	40	M	validation group
n89	0.451479	0.944444	0.57746	0	0	0		0.426397	50	F	validation group
c72	0.29697	1.28079	0.577408	0	0	0		0.380355	45	F	validation group
d1039	0.651129	0.508961	0.577057	0	0	0		0.331399	45	M	validation group
b739	0.114858	1.67481	0.576052	0	0	0		0.192365	60	F	validation group
b291	0.659454	0.488665	0.575891	1	0	0		0.322252	65	M	validation group
d52	0.587714	0.644416	0.575643	0	0	0		0.378732	65	F	validation group
c695	0.356859	1.14706	0.575621	0	0	0		0.409338	40	F	validation group
e1105	0.636955	0.535885	0.574939	0	0	0		0.341335	60	F	validation group
c621	0.146939	1.60287	0.574929	0	0	0		0.235524	30	F	validation group
c1847	0.826389	0.123337	0.574907	1	0	0		0.101925	40	M	validation group
f154	0.730032	0.332953	0.574799	0	0	0		0.243067	35	M	validation group
e18	0.0189215	1.87852	0.573256	0	0	0		0.0355444	30	M	validation group
c769	0.779626	0.221545	0.572957	0	0	0		0.172722	50	F	validation group
b928	0.122961	1.65086	0.572655	0	0	0		0.202992	60	M	training group
b869	0.0890841	1.72414	0.572391	0	0	0		0.153593	55	F	validation group
e67	0.650899	0.5	0.571962	0	0	0		0.325449	45	F	validation group
c114	-0.0130293	1.94499	0.571583	0	0	0		-0.0253419	60	F	training group
e101	0.736069	0.312164	0.570678	0	0	0		0.229774	50	F	validation group
b2060	0.74392	0.294511	0.570378	1	0	0		0.219093	50	M	training group
e571	0.777031	0.221734	0.570011	0	0	0		0.172294	65	M	validation group
V696	0.646	0.51	0.57	0	0	1	advanced-stage	0.32946	60	F	training group
b34	0.673575	0.442149	0.567386	0	0	0		0.29782	65	F	validation group
a1022	0.323641	1.20311	0.566836	0	0	0		0.389375	50	F	validation group
c1748	0.471942	0.87931	0.566363	0	0	0		0.414984	65	F	validation group
n1212	0.0915332	1.70642	0.565701	0	0	0		0.156194	30	M	validation group
c789	0.56237	0.680894	0.565545	0	0	0		0.382915	45	F	validation group
e135	0.112676	1.65985	0.565412	0	0	0		0.187025	50	F	validation group
b1988	0.748913	0.274033	0.565185	1	0	0		0.205227	35	M	validation group
f11	0.737609	0.297561	0.564597	0	0	0		0.219484	30	F	validation group
c518	0.85254	0.0464286	0.564124	0	0	0		0.0395822	35	M	training group
c2092	0.673522	0.43617	0.564087	0	0	0		0.29377	65	M	validation group
c16	0.541818	0.722496	0.56384	0	0	0		0.391461	50	F	validation group
e1080	0.5999	0.593301	0.562364	0	0	0		0.355921	65	F	validation group
e672	0.0846192	1.71464	0.561999	1	0	0		0.145092	65	M	validation group
n77	0.192008	1.48056	0.561863	0	0	0		0.284279	65	M	validation group
e424	0.781065	0.194638	0.560097	0	0	0		0.152025	45	F	validation group
b6	0.539981	0.719008	0.559779	0	0	0		0.388251	65	M	validation group
n155	0.235294	1.38228	0.559684	0	0	0		0.325243	45	F	validation group
d625	0.668005	0.439545	0.559402	0	0	0		0.293618	35	F	validation group
b996	0.284409	1.27296	0.558395	0	0	0		0.362042	60	F	validation group
c1665	0.758427	0.240099	0.558016	0	0	0		0.182098	65	M	validation group
b1070	0.417341	0.981888	0.557515	0	0	0		0.409782	45	F	validation group
c1185	0.451389	0.907658	0.557466	0	0	0		0.409707	35	F	validation group
e204	0.0839286	1.70755	0.55733	0	0	0		0.143312	30	F	validation group
b1262	0.0743427	1.72827	0.55725	0	0	0		0.128484	35	F	validation group
b1064	0.211561	1.42803	0.556458	0	0	0		0.302114	55	F	validation group
n969	0.477259	0.849275	0.55635	0	0	0		0.405324	30	F	validation group
b521	0.191392	1.47084	0.555857	0	0	0		0.281507	55	F	validation group
f135	0.0351438	1.80844	0.554427	0	0	0		0.0635553	50	F	validation group
a557	0.0499597	1.77563	0.554129	0	0	0		0.0887099	60	M	validation group
c2881	0.697872	0.36404	0.55371	1	0	0		0.254053	65	F	validation group
e108	0.440906	0.923574	0.553707	1	0	0		0.407209	55	M	validation group
n689	0.765743	0.214358	0.552679	0	0	0		0.164143	30	F	validation group
n1201	0.248665	1.33945	0.552222	0	0	0		0.333074	40	F	validation group
a228	0.800968	0.136364	0.551975	1	0	0		0.109223	35	M	validation group
n855	0.637869	0.491228	0.551821	1	0	0		0.313339	40	M	training group
b1733	0.740103	0.267586	0.551261	0	0	0		0.198041	50	F	validation group
c1124	0.161111	1.52703	0.550549	0	0	0		0.246021	35	M	validation group
c1865	0.722222	0.304716	0.550277	0	0	0		0.220073	50	M	validation group
b1673	0.399401	1.00744	0.550162	0	0	0		0.402374	60	F	validation group
d676	0.136609	1.57947	0.550051	0	0	0		0.215769	45	F	validation group
e418	0.245562	1.34062	0.549175	1	0	0		0.329204	65	M	validation group
e894	0.600729	0.56682	0.548943	0	0	0		0.340505	65	F	validation group
n100	0.220728	1.39394	0.548765	0	0	0		0.307682	55	M	validation group
c2484	0.310757	1.19767	0.54864	0	0	0		0.372186	45	F	validation group
d714	0.377472	1.05232	0.548594	0	0	0		0.397221	50	F	validation group
c1218	0.162326	1.51818	0.547167	1	0	0		0.24644	65	M	validation group
c394	0.630885	0.497159	0.546762	0	0	0		0.31365	50	M	validation group
b1386	0.357008	1.09282	0.546377	0	0	0		0.390145	60	F	validation group
n549	0.631486	0.492308	0.544828	0	0	0		0.310886	30	F	validation group
f48	0.653061	0.443902	0.544048	0	0	0		0.289895	55	F	validation group
c1811	0.709832	0.320197	0.544001	1	0	0		0.227286	45	M	validation group
c961	0.527335	0.717477	0.543943	0	0	0		0.378351	35	F	validation group
c2459	0.38247	1.03198	0.543429	0	0	0		0.3947	60	M	validation group
c1027	0.654877	0.438298	0.543146	0	0	0		0.287031	30	M	validation group
b563	0.164051	1.50634	0.54275	0	0	0		0.247116	50	F	validation group
n1018	0.410023	0.970588	0.542667	1	0	0		0.397963	55	M	validation group
a92	0.699743	0.339623	0.542611	0	0	0		0.237649	40	F	validation group
n337	0.518519	0.733675	0.542303	0	0	0		0.380424	55	F	validation group
n288	0.412698	0.962868	0.541632	0	0	0		0.397374	45	M	validation group
c709	0.586481	0.58371	0.541222	0	0	0		0.342335	30	M	validation group
d554	0.400642	0.987198	0.54058	0	0	0		0.395513	55	F	validation group
m241	0.682798	0.372583	0.540457	0	0	0		0.254399	30	M	validation group
c2134	0.644647	0.454976	0.540085	0	0	0		0.293299	50	F	validation group
c706	0.722664	0.285068	0.54007	0	0	0		0.206008	30	M	validation group
V382	0.65	0.44	0.54	0	0	1	advanced-stage	0.286	50	F	validation group
c880	0.848257	0.0108043	0.53964	1	1	0		0.00916485	40	M	validation group
c2863	0.45	0.876804	0.538983	0	0	0		0.394562	40	F	validation group
b448	0.62069	0.503775	0.538241	0	0	0		0.312688	55	M	validation group
n836	0.218862	1.37845	0.538076	1	0	0		0.30169	45	M	validation group
n973	0.37134	1.04638	0.538047	1	0	0		0.388561	40	M	validation group
c2732	0.296569	1.20771	0.537236	1	0	0		0.358169	30	M	validation group
c1028	0.557342	0.639716	0.537147	0	0	0		0.356541	35	M	validation group
a1836	0.683318	0.363418	0.536058	0	0	0		0.24833	65	M	validation group
m476	0.199052	1.41626	0.53516	0	0	0		0.281909	35	F	validation group
e646	0.674436	0.379928	0.534507	0	0	0		0.256237	50	M	validation group
n1195	0.149533	1.5221	0.53407	0	0	0		0.227604	35	M	validation group
c2234	0.396694	0.982935	0.533537	0	0	0		0.389925	50	F	validation group
a936	0.637877	0.45757	0.53343	1	0	0		0.291873	65	M	validation group
b571	0.726761	0.263598	0.533195	1	0	0		0.191573	40	M	validation group
a1047	0.285714	1.2233	0.532829	0	0	0		0.349515	65	F	validation group
c2309	0.404313	0.963989	0.532244	0	0	0		0.389753	60	F	validation group
n321	0.594944	0.548015	0.531763	1	0	0		0.326039	35	M	validation group
n170	0.0593838	1.71329	0.531268	0	0	0		0.101741	50	F	validation group
n1179	0.462892	0.834254	0.531048	1	0	0		0.386169	30	M	validation group
n1031	0.346241	1.08824	0.531036	1	0	0		0.376792	65	M	validation group
m80	0.508893	0.732353	0.530097	0	0	0		0.372689	45	F	validation group
V318	0.535	0.68	0.53	0	0	1	advanced-stage	0.3638	50	M	training group
d460	0.420807	0.923735	0.529865	1	0	0		0.388715	50	M	validation group
e193	0.385714	1	0.529783	0	0	0		0.385714	45	F	validation group
b353	0.414211	0.936527	0.529003	0	0	0		0.38792	65	F	validation group
c2862	0.298936	1.18535	0.527802	0	0	0		0.354344	45	F	validation group
c2047	0.668774	0.379578	0.527552	0	0	0		0.253852	30	M	validation group
n1227	0.51106	0.720839	0.526367	0	0	0		0.368392	35	M	validation group
e697	0.126431	1.55695	0.525588	0	0	0		0.196846	65	F	validation group
e433	0.119822	1.571	0.525405	0	0	0		0.188241	65	F	validation group
c2042	0.321113	1.13208	0.525064	0	0	0		0.363524	30	F	validation group
d995	0.642464	0.432311	0.52505	0	0	0		0.277744	40	F	validation group
b1766	0.00344234	1.82345	0.524872	1	0	0		0.00627693	45	M	validation group
b308	0.545927	0.641916	0.524718	0	0	0		0.35044	35	F	validation group
c1086	0.494105	0.753191	0.523858	0	0	0		0.372156	50	M	validation group
d255	0.28496	1.20838	0.523737	0	0	0		0.344341	50	F	validation group
a498	0.150517	1.5	0.523117	0	0	0		0.225776	30	F	validation group
c663	0.670974	0.366516	0.523008	0	0	0		0.245923	45	F	validation group
a873	0.513225	0.708253	0.522041	0	0	0		0.363493	65	M	validation group
c2758	0.129787	1.54265	0.52175	0	0	0		0.200217	30	M	validation group
b1801	0.432309	0.883333	0.52143	0	0	0		0.381873	55	M	validation group
a243	0.0738052	1.66284	0.520805	0	0	0		0.122726	35	M	validation group
c2144	0.104784	1.59242	0.519176	0	0	0		0.166859	35	M	validation group
f150	0.0495208	1.71266	0.519124	0	0	0		0.0848121	60	F	validation group
c2643	0.509896	0.709988	0.51901	0	0	0		0.36202	65	M	validation group
c40	0.134545	1.52709	0.518891	0	0	0		0.205464	30	F	validation group
e707	0.571429	0.57572	0.518854	1	0	0		0.328983	65	M	validation group
d705	0.0587178	1.692	0.51878	0	0	0		0.0993507	45	M	validation group
e1286	0.685613	0.326264	0.518403	0	0	0		0.223691	65	F	validation group
c2226	0.604224	0.502844	0.518049	0	0	0		0.303831	30	F	validation group
a764	0.0357742	1.74039	0.517917	0	0	0		0.0622612	30	M	validation group
a527	0.64158	0.420765	0.517644	1	0	0		0.269955	40	F	validation group
e951	0.13847	1.51613	0.51756	1	0	0		0.209938	35	M	validation group
c801	0.606029	0.497967	0.517529	0	0	0		0.301783	50	M	validation group
d863	0.469072	0.795756	0.51729	0	0	0		0.373267	40	F	validation group
c1449	0.0916976	1.61687	0.51695	1	0	0		0.148263	35	M	validation group
b1732	0.141136	1.50897	0.516814	0	0	0		0.212969	50	F	validation group
m96	0.063279	1.67576	0.515306	1	0	0		0.10604	30	M	validation group
b899	0.543287	0.62931	0.514626	1	0	0		0.341896	65	M	validation group
n176	0.29916	1.16084	0.514595	1	0	0		0.347276	30	M	validation group
e1058	0.171889	1.43794	0.514579	0	0	0		0.247166	30	F	validation group
e537	0.699764	0.28777	0.514177	0	0	0		0.201371	30	F	validation group
d2	0.39772	0.944801	0.513811	0	0	0		0.375766	40	F	validation group
b924	0.111669	1.56681	0.513336	0	0	0		0.174964	30	F	validation group
n874	0.429086	0.874687	0.512812	1	0	0		0.375316	35	M	validation group
d596	0.626255	0.445235	0.512746	0	0	0		0.27883	40	F	validation group
n1260	0.0396644	1.72215	0.512539	0	0	0		0.068308	40	M	validation group
m84	0.37253	0.997059	0.512384	0	0	0		0.371434	40	F	validation group
d548	0.391539	0.955307	0.512186	0	0	0		0.37404	50	M	training group
e1109	0.58688	0.529506	0.511939	1	0	0		0.310756	35	M	validation group
a535	0.539981	0.631148	0.511675	0	0	0		0.340808	40	M	validation group
m386	0.524324	0.66506	0.511576	0	0	0		0.348707	50	F	validation group
c860	0.827882	0.00240096	0.510658	0	0	0		0.00198771	35	F	validation group
c679	0.696819	0.28733	0.510406	1	0	0		0.200217	35	M	validation group
e984	0.174575	1.42389	0.510064	0	0	0		0.248575	55	F	validation group
V595	0.188	1.39	0.51	1	0	1	advanced-stage	0.26132	50	M	validation group
c1	0.0387879	1.71921	0.509871	0	0	0		0.0666846	30	F	validation group
m370	0.115315	1.55181	0.509449	1	0	0		0.178947	65	M	validation group
b121	0.0953895	1.59331	0.508413	0	0	0		0.151986	65	F	validation group
c741	0.525988	0.654472	0.50774	0	0	0		0.344244	50	F	validation group
e28	0.512772	0.683099	0.507658	1	0	0		0.350274	60	M	validation group
d749	0.400287	0.927739	0.507496	1	0	0		0.371362	55	M	validation group
e369	0.529586	0.645482	0.507104	1	0	0		0.341838	65	M	validation group
n1050	0.405467	0.915686	0.50707	0	0	0		0.371281	50	F	validation group
c1782	0.453717	0.810345	0.506917	1	0	0		0.367667	65	M	validation group
c818	0.735967	0.195122	0.506571	0	0	0		0.143603	45	F	validation group
c1117	0.125	1.52477	0.506176	0	0	0		0.190597	35	F	validation group
c714	0.624254	0.436652	0.505623	0	0	0		0.272582	40	M	validation group
c293	0.356364	1.01984	0.505546	1	0	0		0.363434	40	M	validation group
c660	0.446322	0.823529	0.50531	0	0	0		0.367559	35	F	validation group
c1685	0.758427	0.143564	0.505111	0	0	0		0.108883	65	M	validation group
d1036	0.361253	1.00836	0.505088	0	0	0		0.364274	65	F	training group
m233	0.136384	1.49736	0.504731	0	0	0		0.204216	65	F	validation group
b1723	0.399312	0.924138	0.504343	0	0	0		0.369019	40	F	validation group
c429	0.0527307	1.67614	0.502869	0	0	0		0.0883838	30	F	validation group
a518	0.555033	0.581967	0.502642	0	0	0		0.323011	50	F	validation group
n622	0.349584	1.02913	0.50253	1	0	0		0.359766	50	M	validation group
b213	0.0968573	1.57935	0.50248	0	0	0		0.152971	65	F	validation group
m452	0.58018	0.526908	0.502475	0	0	0		0.305701	50	F	validation group
c2527	0.294821	1.14826	0.502466	0	0	0		0.33853	40	F	validation group
c2475	0.536521	0.619186	0.500939	0	0	0		0.332206	30	M	validation group
c1004	0.00113895	1.78449	0.500676	0	0	0		0.00203245	50	F	validation group
e2	0.620624	0.434859	0.500283	1	0	0		0.269884	55	M	validation group
e65	0.00756859	1.76937	0.500055	0	0	0		0.0133916	55	F	validation group
e1026	0.165622	1.42389	0.499329	0	0	0		0.235827	65	F	validation group
n1214	0.486651	0.72346	0.498562	0	0	0		0.352073	35	M	validation group
c2157	0.476082	0.745656	0.498111	0	0	0		0.354993	45	F	validation group
b522	0.0951899	1.57396	0.497517	0	0	0		0.149825	30	F	validation group
e958	0.0791255	1.60829	0.49716	0	0	0		0.127257	50	M	validation group
c2308	0.312668	1.09972	0.49714	0	0	0		0.343849	40	F	validation group
c1719	0.113764	1.53218	0.496779	1	1	0		0.174307	65	M	validation group
a409	0.351212	1.01478	0.496581	0	0	0		0.356403	65	F	validation group
a736	0.0547792	1.65732	0.494964	0	0	0		0.0907867	35	M	validation group
b1106	0.049711	1.66826	0.494908	0	0	0		0.0829306	45	F	validation group
c2490	0.2417	1.25	0.494796	1	0	0		0.302125	65	M	validation group
c2547	0.0416198	1.68501	0.494429	0	0	0		0.0701296	65	F	validation group
b1606	0.731902	0.181141	0.493998	0	0	0		0.132578	55	F	validation group
d741	0.0487805	1.66744	0.493345	0	0	0		0.0813387	45	M	training group
d482	0.170117	1.40223	0.492794	0	0	0		0.238544	40	F	validation group
e484	0.392435	0.917986	0.492709	1	0	0		0.36025	60	M	validation group
b1775	0.26506	1.19448	0.492235	0	0	0		0.31661	65	F	validation group
c2634	0.175306	1.38869	0.491557	0	0	0		0.243446	60	F	validation group
a223	0.533575	0.607438	0.490938	0	0	0		0.324114	55	F	validation group
c2651	0.235627	1.25391	0.489668	0	0	0		0.295455	50	F	validation group
c782	0.621622	0.412602	0.489222	0	0	0		0.256482	35	F	validation group
m23	0.275692	1.16471	0.488587	0	0	0		0.3211	45	M	validation group
c415	0.374765	0.948864	0.488525	0	0	0		0.3556	30	F	validation group
b646	0.100469	1.54603	0.488463	0	0	0		0.155328	65	F	validation group
c1005	0.314351	1.08016	0.488384	0	0	0		0.339548	45	M	validation group
c2736	0.656863	0.334047	0.488221	1	0	0		0.219423	45	M	validation group
c1437	0.656753	0.333639	0.487866	1	0	0		0.219118	30	M	validation group
d1	0.0823306	1.58408	0.487671	0	0	0		0.130418	45	F	validation group
b270	0.333849	1.03526	0.487043	1	0	0		0.345622	65	M	validation group
c881	0.806434	0.0060024	0.486925	0	0	0		0.00484054	35	M	validation group
b665	0.61784	0.416318	0.486735	1	0	0		0.257218	50	M	validation group
c1335	0.675577	0.289515	0.48614	1	0	0		0.19559	65	M	validation group
e676	0.0278746	1.69962	0.486	0	0	0		0.0473763	65	F	validation group
d622	0.522682	0.621622	0.485688	0	0	0		0.32491	40	M	validation group
b1743	0.537005	0.590345	0.48564	0	0	0		0.317018	35	F	validation group
b60	0.0725389	1.60153	0.48554	0	0	0		0.116173	45	F	validation group
a760	0.650643	0.342679	0.485518	0	0	0		0.222962	60	F	validation group
a382	0.121969	1.49261	0.484832	0	0	0		0.182052	40	F	validation group
a419	0.332109	1.03448	0.484528	0	0	0		0.343561	65	F	validation group
c1056	0.618435	0.408511	0.483152	0	0	0		0.252637	30	M	validation group
b829	0.512106	0.639738	0.482985	0	0	0		0.327613	60	F	validation group
c797	0.449064	0.776423	0.482662	0	0	0		0.348664	30	F	validation group
e817	0.115023	1.5	0.480577	0	0	0		0.172535	35	F	validation group
a1021	0.297092	1.10322	0.480396	1	0	0		0.327758	50	M	validation group
n741	0.198646	1.31734	0.480261	1	0	0		0.261684	30	M	validation group
c2218	0.0459137	1.6496	0.480091	0	0	0		0.0757393	35	F	validation group
m113	0.396932	0.884848	0.479862	0	0	0		0.351225	55	F	training group
n838	0.142549	1.4386	0.479769	0	0	0		0.20507	40	M	validation group
c1491	-0.0446097	1.84601	0.479705	0	0	0		-0.08235	50	F	validation group
c646	0.666998	0.29638	0.47964	0	0	0		0.197685	55	M	validation group
c1686	0.478933	0.705446	0.479396	0	0	0		0.337861	35	F	validation group
c2494	0.459495	0.747093	0.479024	1	0	0		0.343286	65	M	validation group
d737	0.281205	1.13442	0.478531	0	0	0		0.319005	55	F	validation group
c2313	0.519317	0.614958	0.477994	1	0	0		0.319358	30	M	validation group
c896	0.792493	0.0198079	0.477821	0	0	0		0.0156976	35	F	validation group
b2080	0.638054	0.356091	0.477818	0	0	0		0.227205	45	M	validation group
c730	0.45328	0.757919	0.477535	0	0	0		0.34355	50	F	validation group
c64	0.563636	0.517241	0.477327	0	0	0		0.291536	40	F	validation group
c2333	0.0467206	1.64266	0.47724	0	0	0		0.076746	50	F	validation group
c1381	0.0943953	1.53829	0.476935	0	0	0		0.145208	30	F	validation group
b209	0.299845	1.09068	0.476798	1	0	0		0.327035	65	F	validation group
c2089	0.302149	1.08546	0.476687	1	0	0		0.327971	60	M	validation group
b2069	0.620887	0.390897	0.476403	1	0	0		0.242703	30	M	training group
n1202	0.535469	0.576671	0.476281	0	0	0		0.30879	45	F	validation group
b367	0.464471	0.730539	0.47588	0	0	0		0.339314	65	F	validation group
c734	0.235586	1.22764	0.475172	0	0	0		0.289216	45	F	validation group
c1003	0.400911	0.86728	0.474968	0	0	0		0.347702	45	F	validation group
m272	0.0431148	1.64499	0.474207	0	0	0		0.0709235	30	F	validation group
c1728	0.0379213	1.65594	0.47401	0	0	0		0.0627955	30	F	validation group
a977	0.729645	0.149355	0.473808	0	1	0		0.108976	35	M	validation group
a31	0.364414	0.943775	0.473333	0	0	0		0.343925	50	F	validation group
m41	0.368577	0.932353	0.472039	1	0	0		0.343644	65	M	validation group
b1402	0.0553111	1.61421	0.471885	0	0	0		0.0892835	50	F	validation group
a261	0.123412	1.46552	0.471666	0	0	0		0.180862	30	M	training group
c2569	0.0933633	1.52967	0.470962	0	0	0		0.142815	45	F	validation group
d977	0.0616062	1.59761	0.470298	0	0	0		0.0984224	40	F	validation group
V721	0.344	0.99	0.47	0	0	1	advanced-stage	0.34056	65	F	training group
V786	0.376	0.92	0.47	0	0	1	advanced-stage	0.34592	35	F	validation group
V851	0.528	0.57	0.47	0	0	1	advanced-stage	0.30096	35	F	validation group
c1951	0.668307	0.275035	0.469481	0	0	0		0.183808	40	M	validation group
n316	0.212816	1.26633	0.469187	1	0	0		0.269494	65	M	validation group
b517	0.618734	0.380389	0.46806	1	0	0		0.23536	40	M	validation group
n295	0.380952	0.897567	0.467737	0	0	0		0.34193	45	M	validation group
e1203	0.452599	0.741401	0.467652	0	0	0		0.335558	55	F	validation group
e532	0.0236407	1.67482	0.467305	0	0	0		0.0395939	55	F	validation group
n234	0.593899	0.431849	0.466624	0	0	0		0.256475	45	F	validation group
n302	0.558495	0.508323	0.466285	0	0	0		0.283896	40	F	validation group
c1023	0.550911	0.524823	0.466277	0	0	0		0.289131	30	M	validation group
c2095	0.258783	1.15957	0.465536	0	0	0		0.300078	45	F	validation group
e1131	0.0130195	1.69378	0.46502	0	0	0		0.0220522	55	F	validation group
f25	0.217201	1.24878	0.464803	0	0	0		0.271237	30	F	validation group
n1141	0.107752	1.48619	0.4643	0	0	0		0.160139	35	F	validation group
b671	0.656481	0.29118	0.464213	1	0	0		0.191154	30	M	validation group
e377	0.0813609	1.5432	0.46405	0	0	0		0.125556	65	F	validation group
e173	0.0869565	1.52853	0.462687	0	0	0		0.132915	40	M	validation group
e47	0.0794702	1.54401	0.462242	0	0	0		0.122703	35	F	validation group
e209	0.469643	0.693396	0.461682	0	0	0		0.325649	40	F	validation group
d574	0.0305098	1.64865	0.461161	0	0	0		0.0503	65	F	validation group
a317	0.523234	0.575163	0.46084	0	0	0		0.300945	30	M	validation group
m234	0.0862297	1.52548	0.460156	0	0	0		0.131542	40	M	validation group
c1058	0.193998	1.29078	0.460134	0	0	0		0.250409	35	M	validation group
f57	0.441691	0.75122	0.460018	0	0	0		0.331807	55	M	training group
e191	0.466071	0.698113	0.460008	1	0	0		0.325371	60	M	validation group
b659	0.029108	1.64644	0.458284	0	0	0		0.0479246	45	F	validation group
m254	0.212055	1.2478	0.458132	0	0	0		0.264602	60	F	validation group
b412	0.695567	0.194921	0.458109	0	0	0		0.135581	50	F	validation group
d972	0.30033	1.0546	0.457594	0	0	0		0.316728	55	F	validation group
c1797	0.665707	0.258621	0.457389	0	0	0		0.172166	30	M	validation group
e679	0.0796416	1.53442	0.457196	0	1	0		0.122204	65	F	validation group
c2143	0.167426	1.34281	0.456946	1	0	0		0.224822	65	M	validation group
e504	0.501182	0.615827	0.456817	0	0	0		0.308642	60	M	validation group
e675	0.394226	0.848561	0.456729	1	0	0		0.334525	60	M	validation group
c1436	0.525403	0.562786	0.456653	0	0	0		0.29569	30	F	validation group
e1218	0.39633	0.843312	0.456365	0	0	0		0.33423	55	M	validation group
c716	0.573559	0.457014	0.456153	0	0	0		0.262124	40	F	validation group
c1593	0.575316	0.452876	0.455983	1	0	0		0.260547	65	M	validation group
c856	0.775335	0.0168067	0.455693	1	0	0		0.0130308	45	M	training group
e251	0.219643	1.22642	0.455473	0	0	0		0.269373	50	M	validation group
e635	0.0858769	1.51701	0.455105	1	0	0		0.130276	65	M	validation group
e508	0.626478	0.339568	0.454943	0	1	0		0.212732	65	M	validation group
c2719	0.323529	0.997859	0.454192	0	0	0		0.322837	35	F	validation group
c92	0.681212	0.218075	0.453681	0	0	0		0.148555	45	F	validation group
c1272	0.362205	0.912121	0.453361	1	0	0		0.330375	65	M	validation group
a468	0.111007	1.45902	0.453314	0	0	0		0.16196	45	F	validation group
b645	0.334272	0.972803	0.453284	0	0	0		0.325181	35	F	validation group
b1203	0.0484908	1.59304	0.452166	0	0	0		0.0772478	30	F	validation group
e231	0.366071	0.900943	0.451855	1	0	0		0.32981	65	M	validation group
n1140	0.357339	0.91989	0.451818	1	0	0		0.328713	35	M	validation group
e864	0.0874636	1.50732	0.451697	0	0	0		0.131835	35	F	validation group
a770	0.703186	0.166147	0.451455	0	0	0		0.116833	35	F	validation group
b594	0.0788732	1.5251	0.451196	0	0	0		0.12029	65	M	validation group
e1252	0.0587156	1.56688	0.450041	1	0	0		0.0920002	45	M	training group
V799	0.303	1.03	0.45	0	0	1	advanced-stage	0.31209	60	M	validation group
b795	0.475422	0.659389	0.449976	0	0	0		0.313488	55	M	training group
a918	0.368871	0.890699	0.449593	0	0	0		0.328553	45	M	validation group
n747	0.235892	1.17993	0.449416	1	0	0		0.278337	55	M	validation group
d286	0.34121	0.950298	0.449249	0	0	0		0.324252	55	F	validation group
c2222	0.582185	0.425484	0.449197	0	0	0		0.24771	65	F	validation group
n367	0.122281	1.42638	0.448901	0	0	0		0.174419	40	F	validation group
b491	0.459747	0.691462	0.448854	1	0	0		0.317898	50	M	validation group
n757	0.0869074	1.50273	0.448533	1	0	0		0.130598	30	M	validation group
b298	0.256499	1.13293	0.448256	1	0	0		0.290597	65	M	training group
e1290	0.121966	1.42577	0.448199	0	0	0		0.173896	55	F	validation group
b1110	0.506358	0.587226	0.447361	0	0	0		0.297347	65	F	validation group
m99	0.322148	0.987879	0.447108	0	0	0		0.318243	40	M	validation group
c733	0.562624	0.463801	0.446867	1	0	0		0.260946	35	M	validation group
d757	0.476327	0.651127	0.446548	0	0	0		0.310149	30	F	validation group
c1763	0.0796163	1.51478	0.44645	1	0	0		0.120601	60	M	validation group
a135	0.640823	0.292453	0.446283	1	0	0		0.18741	60	M	validation group
c2387	0.497754	0.603878	0.446226	0	0	0		0.300583	50	F	validation group
e22	0.556291	0.475352	0.445648	0	0	0		0.264434	55	F	validation group
d561	0.352469	0.918919	0.44551	0	0	0		0.32389	50	F	validation group
m279	0.0842105	1.50281	0.445382	0	0	0		0.126553	50	M	validation group
n886	0.210223	1.22807	0.445191	1	0	0		0.258169	30	M	validation group
c761	0.502079	0.591463	0.444595	0	0	0		0.296961	40	F	validation group
c806	0.599792	0.376016	0.443139	1	0	0		0.225532	55	M	validation group
[truncated: 8,895 more rows]
